# Supplementary material for: Structural study of 1- and 2-naphthol: new insights into the non-covalent H–H interaction in cis-1-naphthol
Source: Royal Society of Chemistry journal article supplement (doi:10.1039/d1cp05632h), 2022-01-01
Supplement: d1cp05632h1.pdf [file d1cp05632h1.pdf]

## Structural Study of 1- and 2-Naphthol: New Insights into the Non-covalent H-H Interaction in *cis*-1-Naphthol

Arsh S. Hazrah,<sup>a</sup> Sadisha Nanayakkara,<sup>b</sup> Nathan A. Seifert,<sup>a,c</sup> Elfi Kraka,<sup>b</sup> and Wolfgang Jäger<sup>a\*</sup>

### Electronic Supplementary Information

Contents:

- 1. Spectroscopic Parameters, Spectra, and Conversion Pathway for 1- and 2-naphthol**
  - Table S1.** Spectroscopic parameters for the naphthol isomers
  - Figure S1.** Broadband rotational spectra of 1- and 2-naphthol
  - Figure S2.** Potential energy curves and zero-pointed corrected barriers for 1- and 2-naphthol
- 2. Rotational Transition Frequencies for Parent Species (Pages 6-12)**
  - Table S2.** Assigned rotational transitions for *cis*-1-naphthol
  - Table S3.** Assigned rotational transitions for *trans*-1-naphthol
  - Table S4.** Assigned rotational transitions for *cis*-2-naphthol
  - Table S5.** Assigned rotational transitions for *trans*-2-naphthol
- 3. Rotational Transition Frequencies for <sup>13</sup>C Isotopologues (Pages 13-22)**
  - Table S6.** Assigned rotational transitions for *cis*-1-naphthol <sup>13</sup>C isotopologues
  - Table S7.** Assigned rotational transitions for *trans*-1-naphthol <sup>13</sup>C isotopologues
  - Table S8.** Assigned rotational transitions for *cis*-2-naphthol <sup>13</sup>C isotopologues
  - Table S9.** Assigned rotational transitions for *trans*-2-naphthol <sup>13</sup>C isotopologues
- 4. Rotational and Centrifugal Distortion Constants for <sup>13</sup>C Isotopologues (Pages 23-26)**
  - Table S10.** Rotational transitions for <sup>13</sup>C isotopologues of *cis*-1-naphthol
  - Table S11.** Rotational transitions for <sup>13</sup>C isotopologues of *trans*-1-naphthol
  - Table S12.** Rotational transitions for <sup>13</sup>C isotopologues of *cis*-2-naphthol
  - Table S13.** Rotational transitions for <sup>13</sup>C isotopologues of *trans*-2-naphthol
- 5. Structural Parameters (Pages 27-28)**
  - Table S14.** Structural parameters for *cis*-1-naphthol
  - Table S15.** Structural parameters for *trans*-1-naphthol
  - Table S16.** Structural parameters for *cis*-2-naphthol
  - Table S17.** Structural parameters for *trans*-2-naphthol
- 6. AIMA11 (Page 29-30)**
  - Table S18.** Data from AIMA11 QTAIM calculations
  - Table S19.** *Cis*-1-naphthol theoretical method comparison
- 7. Semi-experimental Rotational Frequencies for <sup>12</sup>C and <sup>13</sup>C Isotopologues (Pages 31-33)**
  - Table S20.** Semi-experimental rotational constants for parent species
  - Table S21.** Semi-experimental rotational constants for *cis*-1-naphthol <sup>13</sup>C isotopologues
  - Table S22.** Semi-experimental rotational constants for *trans*-1-naphthol <sup>13</sup>C isotopologues
  - Table S23.** Semi-experimental rotational constants for *cis*-2-naphthol <sup>13</sup>C isotopologues
  - Table S24.** Semi-experimental rotational constants for *trans*-2-naphthol <sup>13</sup>C isotopologues
- 8. Non-Covalent Interactions (Page 34-35)**
  - Figure S3.** Non-covalent interactions plot of naphthol conformers
  - Figure S4.** Non-covalent interactions plot of equilibrium and planar geometries of biphenyl
- 9. Local Mode Analysis (Pages 36-39)**
  - Figure S5.** Decomposition plot for all normal modes of *cis*-1-naphthol
  - Figure S6.** Decomposition plot for all normal modes of *trans*-1-naphthol

- c. **Figure S7.** Vibrational displacement vectors for the O-H stretching motion
  - d. **Table S25.** Local Mode Force Constants and Local Mode Frequencies
- 10. Inertial Defect Differences (Pages 40-46)**
- a. **Table S26.** Moment of inertia and Inertial defect values for calculated and experimental results
  - b. **Table S27.** Calculated inertial defect values obtained from Oka's equation
  - c. **Table S28.** Inertial defect differences between calculated and experimental defect values
  - d. **Table S29.** Lowest out-of-plane modes for naphthol isomers and previous work
  - e. **Figure S8.** Lowest out-of-plane vibrational modes for *cis*-1-naphthol
  - f. **Figure S9.** Lowest out-of-plane vibrational modes for *trans*-1-naphthol
  - g. **Figure S10.** Lowest out-of-plane vibrational modes for *cis*-2-naphthol
  - h. **Figure S11.** Lowest out-of-plane vibrational modes for *trans*-2-naphthol
  - i. **Figure S12.** Inertial defect differences for the four isomers of naphthol compared to the results of Jahn et al.
- 11. Charge Model 5 (Pages 47-49)**
- a. **Figure S13.** Atom labelling used in the description of the naphthol H-H interaction
  - b. **Figure S14.** CM5 charges for atoms involved in the naphthol H-H interaction
  - c. **Figure S15.** CM5 charges for atoms involved in the biphenyl H-H interaction
  - d. **Table S30.** Net CM5 charge change for naphthol and biphenyl
- 12. NBO Analysis (Pages 50-53)**
- a. **Table S31.** Bonding and antibonding orbital occupancy
  - b. **Table S32.** Interaction Energies between bonding and antibonding orbitals for *trans*-1-naphthol
  - c. **Table S33.** Interaction Energies between bonding and antibonding orbitals for *cis*-1-naphthol
  - d. **Table S34.** Interaction Energies between bonding and antibonding orbitals for *trans*-2-naphthol
  - e. **Table S35.** Interaction Energies between bonding and antibonding orbitals for *cis*-2-naphthol
  - f. **Figure S16.** Heavy atom steric exchange and donor-acceptor interaction energies
  - g. **Table S36.** *Cis*-1-naphthol theoretical method comparison

# Spectroscopic Parameters, Spectra, and Conversion Pathway for 1- and 2-naphthol

**Table S1.** Spectroscopic parameters for the naphthol isomers from theory and from fits of experimental data.

|                                                      | <i>cis</i> -1-naphthol<br>(B3LYP-D3(BJ)/def2-TZVP) | <i>cis</i> -1-naphthol <sup>a</sup><br>(experiment) | <i>trans</i> -1-naphthol<br>(B3LYP-D3(BJ)/def2-TZVP) | <i>trans</i> -1-naphthol <sup>b,c</sup><br>(experiment) |
|------------------------------------------------------|----------------------------------------------------|-----------------------------------------------------|------------------------------------------------------|---------------------------------------------------------|
| <b>A /MHz</b>                                        | 1959.8594                                          | 1947.51340(61)                                      | 1955.1739                                            | 1942.10135(21)                                          |
| <b>B</b>                                             | 1130.8399                                          | 1124.307930(90)                                     | 1139.0560                                            | 1133.623460(88)                                         |
| <b>C</b>                                             | 717.1278                                           | 713.096200(63)                                      | 719.7438                                             | 716.017810(49)                                          |
| <b><math>\Delta_J</math> /kHz</b>                    | 0.05262                                            | [0.0136] <sup>b</sup>                               | 0.05331                                              | 0.01810(70)                                             |
| <b><math>\Delta_{JK}</math></b>                      | -0.08807                                           | [0.0409] <sup>b</sup>                               | -0.09152                                             | 0.0240(35)                                              |
| <b><math>\Delta_K</math></b>                         | 0.04032                                            | 0.30(12)                                            | 0.04306                                              | 0.059(20)                                               |
| <b><math>\delta_J</math></b>                         | 0.01201                                            | 0.00382(21)                                         | 0.01177                                              | 0.00630(34)                                             |
| <b><math>\delta_K</math></b>                         | -0.01278                                           | 0.0440(98)                                          | -0.01482                                             | 0.0355(19)                                              |
| <b>N</b>                                             | -                                                  | 60                                                  | -                                                    | 117                                                     |
| <b><math>\sigma</math> /kHz</b>                      | -                                                  | 2.1                                                 | -                                                    | 2.2                                                     |
| <b><math>\Delta E_0</math> / kJ mol<sup>-1</sup></b> | 3.3                                                | -                                                   | 0.0                                                  | -                                                       |
| <b><math>\Delta</math> / amu Å<sup>2</sup></b>       | -0.0443                                            | -0.2925(2)                                          | 0.0001                                               | -0.2124(2)                                              |
| <b><math> \mu </math> / D</b>                        | $\mu_a=1.4, \mu_b=0.3, \mu_c=0.1$                  | $\mu_a > \mu_b$                                     | $\mu_a=1.2, \mu_b=0.1, \mu_c=0.0$                    | $\mu_a > \mu_b$                                         |
|                                                      | <i>cis</i> -2-naphthol<br>(B3LYP-D3(BJ)/def2-TZVP) | <i>cis</i> -2-naphthol <sup>f</sup><br>(experiment) | <i>trans</i> -2-naphthol<br>(B3LYP-D3(BJ)/def2-TZVP) | <i>trans</i> -2-naphthol<br>(experiment)                |
| <b>A /MHz</b>                                        | 2870.7044                                          | 2849.15700(28)                                      | 2868.6589                                            | 2845.35720(37)                                          |
| <b>B</b>                                             | 828.9859                                           | 824.63285(12)                                       | 829.6421                                             | 825.5363521(13)                                         |
| <b>C</b>                                             | 643.2358                                           | 639.72412(11)                                       | 643.5280                                             | 640.087128(16)                                          |
| <b><math>\Delta_J</math> /kHz</b>                    | 0.00797                                            | 0.0130(27)                                          | 0.00793                                              | 0.00706(17)                                             |
| <b><math>\Delta_{JK}</math></b>                      | 0.01426                                            | [0.014844] <sup>d</sup>                             | 0.01508                                              | [0.015080] <sup>e</sup>                                 |
| <b><math>\Delta_K</math></b>                         | 0.18312                                            | 0.170(29)                                           | 0.18328                                              | 0.2615(17)                                              |
| <b><math>\delta_J</math></b>                         | 0.00200                                            | 0.00260(60)                                         | 0.00197                                              | 0.00180(92)                                             |
| <b><math>\delta_K</math></b>                         | 0.02966                                            | [0.030525] <sup>d</sup>                             | 0.02969                                              | [0.02969] <sup>e</sup>                                  |
| <b>N</b>                                             | -                                                  | 41                                                  | -                                                    | 49                                                      |
| <b><math>\sigma</math> /kHz</b>                      | -                                                  | 1.4                                                 | -                                                    | 2.7                                                     |
| <b><math>\Delta E_0</math> / kJ mol<sup>-1</sup></b> | 0.0                                                | -                                                   | 2.1                                                  | -                                                       |
| <b><math>\Delta</math> / amu Å<sup>2</sup></b>       | 0.0001                                             | -0.2366(2)                                          | 0.0000                                               | -0.251(1)                                               |
| <b><math> \mu </math> / D</b>                        | $\mu_a=0.2, \mu_b=1.0, \mu_c=0.1$                  | $\mu_b > \mu_a$                                     | $\mu_a=0.6, \mu_b=1.4, \mu_c=0.0$                    | $\mu_b > \mu_a$                                         |

<sup>a</sup> assigned rotational transitions from Whitham et al.<sup>20</sup> are included in fit.

<sup>b</sup> fixed at the values from Whitham et al.<sup>20</sup>

<sup>c</sup> note that the spectroscopic constants derived by Goubet et al.<sup>21</sup> for *trans*-1-naphthol and *cis*-2-naphthol have significantly higher accuracy than the values reported here because of the much larger number of transitions in the fits. Unfortunately, their transition frequencies are not published, so that they were not included in our fits.

<sup>e</sup> fixed at the values from Goubet et al.<sup>21</sup>

<sup>d</sup> fixed at the values from theory.

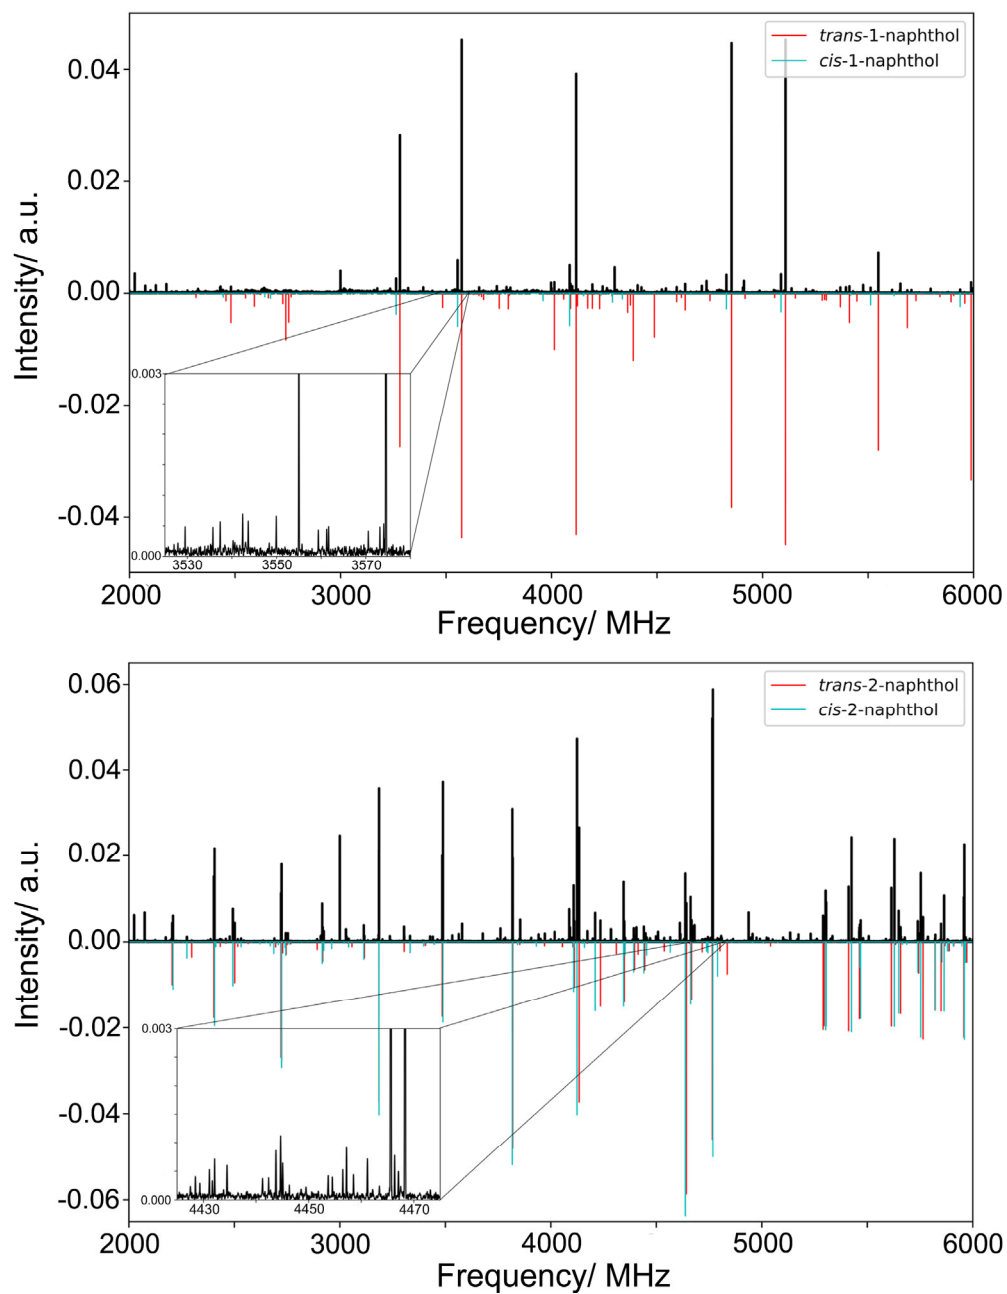

**Figure S1.** Broadband rotational spectra of 1-naphthol (top) and 2-naphthol (bottom). The experimental spectra are in black, while the red and blue spectra represent the simulated spectra for the *trans*- and *cis*-conformer, respectively.

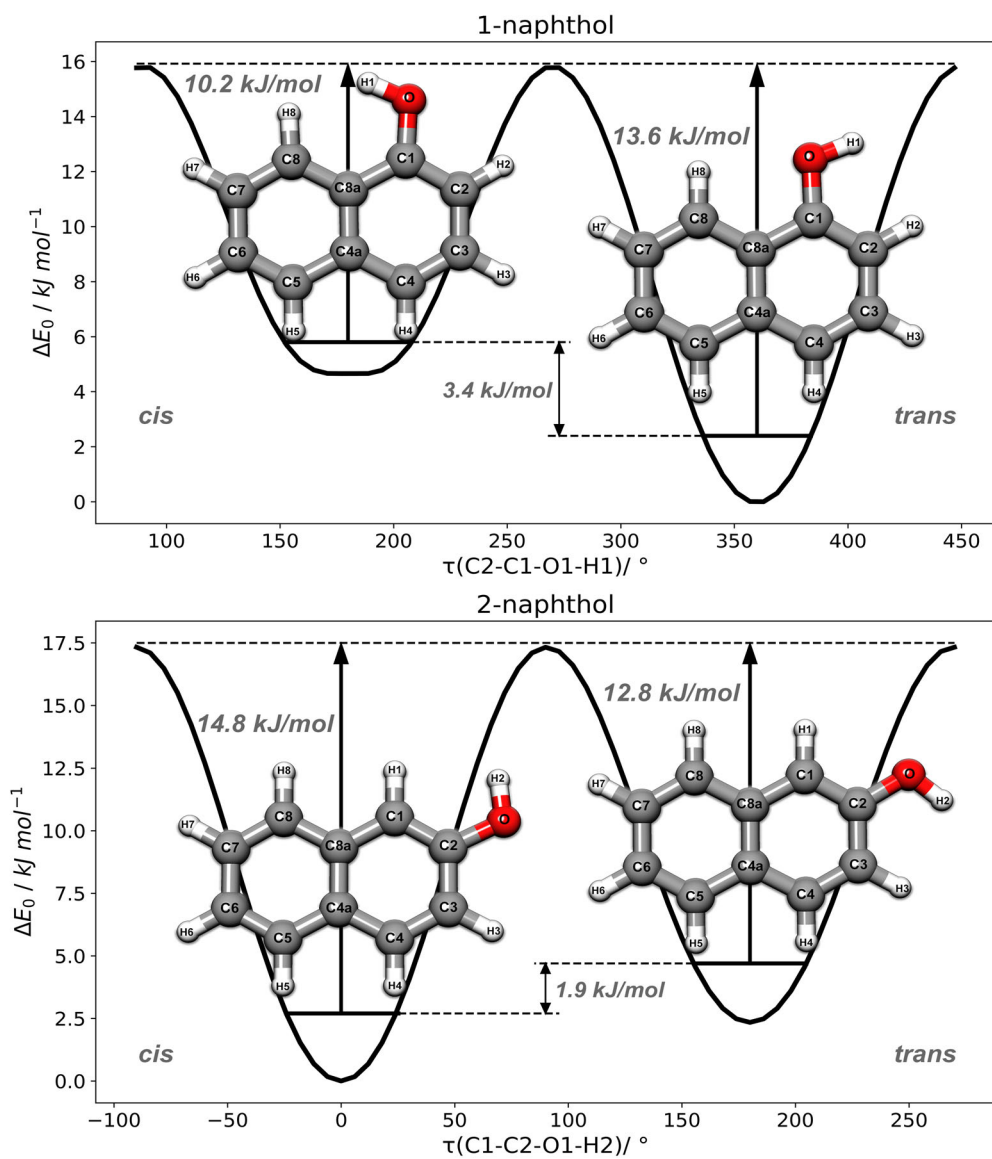

**Figure S2.** Potential energy curves and zero-point corrected *cis-trans* barriers for 1-naphthol (top) and 2-naphthol (bottom), calculated at the B3LYP-D3(BJ)/def2-TZVP level of theory.

### Rotational Transition Frequencies

| J' | K <sub>a</sub> ' | K <sub>c</sub> ' | J'' | K <sub>a</sub> '' | K <sub>c</sub> '' | $\nu_{\text{Exp}}/ \text{MHz}$ | $\Delta\nu^a/ \text{MHz}$ |
|----|------------------|------------------|-----|-------------------|-------------------|--------------------------------|---------------------------|
| 1  | 0                | 1                | 0   | 0                 | 0                 | 1837.398                       | -0.007                    |
| 5  | 2                | 3                | 5   | 2                 | 4                 | 2668.247                       | -0.001                    |
| 2  | 1                | 2                | 1   | 1                 | 1                 | 3263.597                       | -0.002                    |
| 2  | 0                | 2                | 1   | 0                 | 1                 | 3555.025                       | -0.002                    |
| 4  | 1                | 3                | 4   | 1                 | 4                 | 3960.015                       | 0.007                     |
| 2  | 1                | 1                | 1   | 1                 | 0                 | 4086.020                       | 0.001                     |
| 2  | 1                | 2                | 1   | 0                 | 1                 | 4086.800                       | -0.004                    |
| 2  | 2                | 1                | 2   | 0                 | 2                 | 4235.020                       | -0.005                    |
| 6  | 2                | 4                | 6   | 2                 | 5                 | 4289.167                       | -0.007                    |
| 3  | 2                | 2                | 3   | 0                 | 3                 | 4659.584                       | 0.001                     |
| 3  | 1                | 3                | 2   | 1                 | 2                 | 4828.862                       | -0.002                    |
| 3  | 0                | 3                | 2   | 0                 | 2                 | 5087.650                       | -0.003                    |
| 4  | 2                | 3                | 4   | 0                 | 4                 | 5417.279                       | 0.002                     |
| 3  | 2                | 2                | 2   | 2                 | 1                 | 5512.212                       | -0.000                    |
| 5  | 1                | 4                | 5   | 1                 | 5                 | 5623.450                       | 0.005                     |
| 3  | 2                | 1                | 2   | 2                 | 0                 | 5936.774                       | 0.001                     |
| 3  | 1                | 2                | 2   | 1                 | 1                 | 6039.545                       | -0.001                    |
| 4  | 1                | 4                | 3   | 1                 | 3                 | 6341.026                       | -0.003                    |
| 4  | 0                | 4                | 3   | 0                 | 3                 | 6496.777                       | -0.001                    |
| 4  | 2                | 3                | 3   | 2                 | 2                 | 7254.472                       | 0.001                     |
| 5  | 1                | 5                | 4   | 1                 | 4                 | 7812.217                       | 0.005                     |
| 4  | 1                | 3                | 3   | 1                 | 2                 | 7856.723                       | -0.001                    |
| 5  | 0                | 5                | 4   | 0                 | 4                 | 7884.514                       | 0.006                     |
| 6  | 1                | 6                | 5   | 1                 | 5                 | 9258.636                       | 0.004                     |
| 5  | 1                | 4                | 4   | 1                 | 3                 | 9475.640                       | -0.008                    |
| 5  | 3                | 2                | 4   | 3                 | 1                 | 9809.353                       | 0.001                     |

**Table S2.** Measured frequencies of assigned rotational transitions of *cis*-1-naphthol.  $\Delta\nu^a$  is the difference between observed and calculated frequencies.

**Table S3.** Measured frequencies of assigned rotational transitions of *trans*-1-naphthol.  $\Delta v^a$  is the difference between observed and calculated frequencies.

| J' | K <sub>a</sub> ' | K <sub>c</sub> ' | J'' | K <sub>a</sub> '' | K <sub>c</sub> '' | $\nu_{\text{Exp}}/ \text{MHz}$ | $\Delta v^a/ \text{MHz}$ |
|----|------------------|------------------|-----|-------------------|-------------------|--------------------------------|--------------------------|
| 1  | 0                | 1                | 0   | 0                 | 0                 | 1849.640                       | -0.001                   |
| 3  | 2                | 1                | 3   | 1                 | 2                 | 2457.272                       | -0.002                   |
| 3  | 1                | 2                | 3   | 1                 | 3                 | 2481.055                       | -0.000                   |
| 2  | 2                | 0                | 2   | 1                 | 1                 | 2550.181                       | -0.001                   |
| 1  | 1                | 1                | 0   | 0                 | 0                 | 2658.118                       | -0.001                   |
| 4  | 2                | 2                | 4   | 1                 | 3                 | 2726.881                       | 0.003                    |
| 5  | 2                | 3                | 5   | 2                 | 4                 | 2740.972                       | 0.002                    |
| 7  | 3                | 4                | 7   | 3                 | 5                 | 2754.832                       | -0.001                   |
| 2  | 0                | 2                | 1   | 1                 | 1                 | 2766.057                       | 0.002                    |
| 2  | 1                | 2                | 1   | 1                 | 1                 | 3281.677                       | -0.000                   |

|   |   |   |   |   |   |          |        |
|---|---|---|---|---|---|----------|--------|
| 5 | 2 | 3 | 5 | 1 | 4 | 3484.039 | -0.003 |
| 2 | 0 | 2 | 1 | 0 | 1 | 3574.533 | -0.001 |
| 3 | 1 | 2 | 2 | 2 | 1 | 3656.192 | -0.000 |
| 2 | 2 | 1 | 2 | 1 | 2 | 3678.248 | -0.001 |
| 4 | 1 | 3 | 4 | 1 | 4 | 4013.698 | -0.001 |
| 2 | 1 | 2 | 1 | 0 | 1 | 4090.154 | -0.001 |
| 2 | 1 | 1 | 1 | 1 | 0 | 4116.887 | -0.001 |
| 4 | 1 | 3 | 4 | 0 | 4 | 4123.074 | 0.000  |
| 4 | 3 | 1 | 4 | 2 | 2 | 4171.805 | -0.002 |
| 2 | 2 | 1 | 2 | 0 | 2 | 4193.869 | -0.001 |
| 3 | 2 | 2 | 3 | 1 | 3 | 4373.798 | 0.013  |
| 6 | 2 | 4 | 6 | 2 | 5 | 4387.622 | -0.001 |
| 8 | 3 | 5 | 8 | 3 | 6 | 4487.575 | -0.004 |
| 3 | 0 | 3 | 2 | 1 | 2 | 4593.506 | -0.000 |
| 3 | 3 | 0 | 3 | 2 | 1 | 4615.560 | 0.001  |
| 3 | 2 | 2 | 3 | 0 | 3 | 4633.665 | -0.001 |
| 6 | 2 | 4 | 6 | 1 | 5 | 4751.213 | -0.000 |
| 3 | 1 | 3 | 2 | 1 | 2 | 4853.387 | 0.001  |
| 3 | 0 | 3 | 2 | 0 | 2 | 5109.127 | -0.001 |
| 3 | 3 | 1 | 3 | 2 | 2 | 5155.527 | -0.001 |
| 4 | 2 | 3 | 4 | 1 | 4 | 5302.553 | -0.003 |
| 3 | 1 | 3 | 2 | 0 | 2 | 5369.008 | 0.000  |
| 4 | 2 | 3 | 4 | 0 | 4 | 5411.929 | -0.002 |
| 4 | 3 | 2 | 4 | 2 | 3 | 5447.473 | -0.006 |
| 3 | 2 | 2 | 2 | 2 | 1 | 5548.922 | -0.000 |
| 5 | 1 | 4 | 5 | 1 | 5 | 5686.213 | -0.002 |
| 5 | 1 | 4 | 5 | 0 | 5 | 5727.304 | -0.003 |
| 5 | 3 | 3 | 5 | 2 | 4 | 5958.694 | 0.001  |
| 3 | 2 | 1 | 2 | 2 | 0 | 5988.718 | 0.001  |
| 4 | 1 | 3 | 3 | 2 | 2 | 6010.509 | -0.001 |
| 3 | 1 | 2 | 2 | 1 | 1 | 6081.625 | -0.001 |
| 7 | 2 | 5 | 7 | 2 | 6 | 6223.969 | 0.002  |
| 4 | 0 | 4 | 3 | 1 | 3 | 6261.220 | -0.001 |
| 4 | 1 | 4 | 3 | 1 | 3 | 6370.596 | -0.000 |
| 7 | 2 | 5 | 7 | 1 | 6 | 6380.619 | 0.009  |
| 5 | 2 | 4 | 5 | 1 | 5 | 6429.283 | -0.003 |
| 5 | 2 | 4 | 5 | 0 | 5 | 6470.377 | -0.001 |
| 4 | 0 | 4 | 3 | 0 | 3 | 6521.101 | -0.001 |
| 2 | 2 | 1 | 1 | 1 | 0 | 6542.319 | -0.002 |
| 4 | 1 | 4 | 3 | 0 | 3 | 6630.474 | -0.002 |
| 5 | 3 | 3 | 5 | 1 | 4 | 6701.765 | -0.001 |
| 4 | 3 | 2 | 4 | 1 | 3 | 6736.338 | 0.002  |
| 2 | 2 | 0 | 1 | 1 | 1 | 7084.677 | 0.002  |



|   |   |   |   |   |   |          |        |
|---|---|---|---|---|---|----------|--------|
| 4 | 2 | 3 | 3 | 2 | 2 | 7299.366 | -0.000 |
| 6 | 1 | 5 | 6 | 1 | 6 | 7336.284 | -0.001 |
| 4 | 3 | 2 | 3 | 3 | 1 | 7591.315 | -0.002 |
| 6 | 2 | 5 | 6 | 0 | 6 | 7714.264 | -0.001 |
| 4 | 3 | 1 | 3 | 3 | 0 | 7729.093 | 0.001  |
| 5 | 1 | 5 | 4 | 1 | 4 | 7846.416 | -0.001 |
| 2 | 2 | 0 | 1 | 0 | 1 | 7893.159 | 0.006  |
| 4 | 1 | 3 | 3 | 1 | 2 | 7903.243 | 0.004  |
| 5 | 0 | 5 | 4 | 0 | 4 | 7914.702 | 0.002  |
| 5 | 1 | 5 | 4 | 0 | 4 | 7955.792 | 0.000  |

---

**Table S4.** Measured frequencies of assigned rotational transitions of *cis*-2-naphthol.  $\Delta v^a$  is the difference between observed and calculated frequencies.

| J' | K <sub>a</sub> ' | K <sub>c</sub> ' | J'' | K <sub>a</sub> '' | K <sub>c</sub> '' | $\nu_{\text{Exp}}/ \text{MHz}$ | $\Delta v^a/ \text{MHz}$ |
|----|------------------|------------------|-----|-------------------|-------------------|--------------------------------|--------------------------|
| 1  | 1                | 0                | 1   | 0                 | 1                 | 2209.433                       | 0.001                    |
| 2  | 1                | 1                | 2   | 0                 | 2                 | 2406.436                       | -0.001                   |
| 3  | 0                | 3                | 2   | 1                 | 2                 | 2493.315                       | -0.001                   |
| 3  | 1                | 2                | 3   | 0                 | 3                 | 2724.020                       | 0.001                    |
| 2  | 1                | 2                | 1   | 1                 | 1                 | 2743.806                       | 0.002                    |
| 2  | 0                | 2                | 1   | 0                 | 1                 | 2916.615                       | -0.002                   |
| 2  | 1                | 1                | 1   | 1                 | 0                 | 3113.621                       | -0.001                   |
| 4  | 1                | 3                | 4   | 0                 | 4                 | 3186.057                       | -0.001                   |
| 4  | 3                | 1                | 5   | 2                 | 4                 | 3332.956                       | 0.003                    |
| 1  | 1                | 1                | 0   | 0                 | 0                 | 3488.881                       | 0.001                    |
| 5  | 1                | 4                | 5   | 0                 | 5                 | 3817.735                       | -0.002                   |
| 3  | 1                | 3                | 2   | 1                 | 2                 | 4108.378                       | -0.001                   |
| 4  | 0                | 4                | 3   | 1                 | 3                 | 4124.399                       | -0.001                   |
| 6  | 1                | 5                | 5   | 2                 | 4                 | 4210.154                       | 0.000                    |
| 3  | 0                | 3                | 2   | 0                 | 2                 | 4345.026                       | -0.000                   |
| 3  | 2                | 2                | 2   | 2                 | 1                 | 4393.069                       | -0.000                   |
| 3  | 2                | 1                | 2   | 2                 | 0                 | 4441.112                       | -0.000                   |
| 3  | 3                | 1                | 4   | 2                 | 2                 | 4566.116                       | -0.003                   |
| 6  | 1                | 5                | 6   | 0                 | 6                 | 4637.525                       | 0.002                    |
| 3  | 1                | 2                | 2   | 1                 | 1                 | 4662.609                       | 0.000                    |
| 3  | 3                | 0                | 4   | 2                 | 3                 | 4744.698                       | 0.001                    |
| 2  | 1                | 2                | 1   | 0                 | 1                 | 4768.330                       | 0.002                    |
| 6  | 2                | 4                | 6   | 1                 | 5                 | 5302.829                       | -0.002                   |
| 7  | 2                | 5                | 7   | 1                 | 6                 | 5305.223                       | -0.004                   |
| 5  | 2                | 3                | 5   | 1                 | 4                 | 5425.342                       | -0.000                   |
| 4  | 1                | 4                | 3   | 1                 | 3                 | 5464.836                       | 0.001                    |
| 8  | 2                | 6                | 8   | 1                 | 7                 | 5468.910                       | -0.003                   |
| 4  | 2                | 2                | 4   | 1                 | 3                 | 5628.617                       | -0.000                   |
| 7  | 1                | 6                | 7   | 0                 | 7                 | 5648.833                       | 0.000                    |
| 4  | 0                | 4                | 3   | 0                 | 3                 | 5739.464                       | 0.001                    |
| 5  | 0                | 5                | 4   | 1                 | 4                 | 5753.640                       | 0.001                    |
| 9  | 2                | 7                | 9   | 1                 | 8                 | 5822.737                       | -0.001                   |
| 4  | 2                | 3                | 3   | 2                 | 2                 | 5848.006                       | -0.000                   |
| 3  | 2                | 1                | 3   | 1                 | 2                 | 5864.169                       | 0.001                    |
| 4  | 3                | 2                | 3   | 3                 | 1                 | 5880.199                       | 0.002                    |
| 4  | 3                | 1                | 3   | 3                 | 0                 | 5883.163                       | -0.001                   |
| 3  | 1                | 3                | 2   | 0                 | 2                 | 5960.089                       | -0.001                   |
| 4  | 2                | 2                | 3   | 2                 | 1                 | 5965.948                       | -0.003                   |

|   |   |   |   |   |   |          |       |
|---|---|---|---|---|---|----------|-------|
| 2 | 2 | 0 | 2 | 1 | 1 | 6085.668 | 0.004 |
| 4 | 1 | 3 | 3 | 1 | 2 | 6201.504 | 0.003 |
| 2 | 2 | 1 | 2 | 1 | 2 | 6628.296 | 0.001 |

---

**Table S5.** Measured frequencies of assigned rotational transitions of *trans*-2-naphthol.  $\Delta\nu^a$  is the difference between observed and calculated frequencies.

| J' | K <sub>a</sub> ' | K <sub>c</sub> ' | J'' | K <sub>a</sub> '' | K <sub>c</sub> '' | $\nu_{\text{Exp}}/ \text{MHz}$ | $\Delta\nu^a/ \text{MHz}$ |
|----|------------------|------------------|-----|-------------------|-------------------|--------------------------------|---------------------------|
| 1  | 1                | 0                | 1   | 0                 | 1                 | 2205.270                       | 0.000                     |
| 5  | 1                | 4                | 4   | 2                 | 3                 | 2298.211                       | -0.010                    |
| 2  | 1                | 1                | 2   | 0                 | 2                 | 2402.909                       | -0.002                    |
| 3  | 0                | 3                | 2   | 1                 | 2                 | 2501.886                       | 0.001                     |
| 2  | 2                | 0                | 3   | 1                 | 3                 | 2516.691                       | 0.004                     |
| 3  | 1                | 2                | 3   | 0                 | 3                 | 2721.618                       | -0.002                    |
| 8  | 2                | 6                | 7   | 3                 | 5                 | 2728.994                       | 0.005                     |
| 2  | 1                | 2                | 1   | 1                 | 1                 | 2745.798                       | 0.001                     |
| 4  | 3                | 2                | 5   | 2                 | 3                 | 2892.790                       | 0.004                     |
| 2  | 0                | 2                | 1   | 0                 | 1                 | 2919.051                       | -0.003                    |
| 7  | 4                | 3                | 8   | 3                 | 6                 | 2919.739                       | -0.003                    |
| 2  | 1                | 1                | 1   | 1                 | 0                 | 3116.697                       | 0.002                     |
| 4  | 1                | 3                | 4   | 0                 | 4                 | 3185.433                       | -0.004                    |
| 4  | 3                | 1                | 5   | 2                 | 4                 | 3305.007                       | -0.005                    |
| 1  | 1                | 1                | 0   | 0                 | 0                 | 3485.444                       | 0.001                     |
| 5  | 1                | 4                | 5   | 0                 | 5                 | 3819.652                       | -0.009                    |
| 3  | 1                | 3                | 2   | 1                 | 2                 | 4111.311                       | 0.001                     |
| 4  | 0                | 4                | 3   | 1                 | 3                 | 4134.196                       | 0.000                     |
| 6  | 1                | 5                | 5   | 2                 | 4                 | 4235.301                       | -0.008                    |
| 6  | 4                | 3                | 7   | 3                 | 4                 | 4310.392                       | -0.002                    |
| 3  | 0                | 3                | 2   | 0                 | 2                 | 4348.448                       | 0.001                     |
| 3  | 2                | 2                | 2   | 2                 | 1                 | 4396.869                       | 0.000                     |
| 6  | 4                | 2                | 7   | 3                 | 5                 | 4413.621                       | 0.006                     |
| 3  | 2                | 1                | 2   | 2                 | 0                 | 4445.291                       | 0.000                     |
| 3  | 3                | 1                | 4   | 2                 | 2                 | 4537.629                       | 0.001                     |
| 6  | 1                | 5                | 6   | 0                 | 6                 | 4642.702                       | -0.010                    |
| 3  | 1                | 2                | 2   | 1                 | 1                 | 4667.156                       | 0.000                     |
| 3  | 3                | 0                | 4   | 2                 | 3                 | 4717.604                       | 0.007                     |
| 2  | 1                | 2                | 1   | 0                 | 1                 | 4765.619                       | 0.003                     |
| 9  | 2                | 7                | 8   | 3                 | 6                 | 4836.036                       | -0.031                    |
| 6  | 2                | 4                | 6   | 1                 | 5                 | 5290.499                       | -0.006                    |
| 7  | 2                | 5                | 7   | 1                 | 6                 | 5295.399                       | -0.010                    |
| 5  | 2                | 3                | 5   | 1                 | 4                 | 5411.525                       | -0.003                    |
| 8  | 2                | 6                | 8   | 1                 | 7                 | 5462.669                       | -0.016                    |
| 4  | 1                | 4                | 3   | 1                 | 3                 | 5468.650                       | 0.004                     |
| 4  | 2                | 2                | 4   | 1                 | 3                 | 5614.197                       | -0.001                    |
| 7  | 1                | 6                | 7   | 0                 | 7                 | 5657.738                       | -0.021                    |
| 4  | 0                | 4                | 3   | 0                 | 3                 | 5743.622                       | 0.001                     |

|   |   |   |   |   |   |          |        |
|---|---|---|---|---|---|----------|--------|
| 5 | 0 | 5 | 4 | 1 | 4 | 5764.281 | 0.002  |
| 9 | 2 | 7 | 9 | 1 | 8 | 5821.179 | -0.021 |
| 3 | 2 | 1 | 3 | 1 | 2 | 5849.785 | 0.001  |
| 4 | 2 | 3 | 3 | 2 | 2 | 5852.999 | 0.000  |
| 4 | 3 | 2 | 3 | 3 | 1 | 5885.443 | 0.003  |
| 4 | 3 | 1 | 3 | 3 | 0 | 5888.447 | 0.002  |
| 5 | 4 | 1 | 6 | 3 | 4 | 5909.708 | -0.006 |
| 3 | 1 | 3 | 2 | 0 | 2 | 5957.873 | 0.001  |
| 4 | 2 | 2 | 3 | 2 | 1 | 5971.849 | -0.004 |
| 2 | 2 | 0 | 2 | 1 | 1 | 6071.652 | 0.003  |
| 4 | 1 | 3 | 3 | 1 | 2 | 6207.438 | 0.000  |
| 7 | 1 | 6 | 6 | 2 | 5 | 6212.612 | -0.008 |

---

## Rotational Transition Frequencies for <sup>13</sup>C Isotopologues

**Table S6.** Frequencies of rotational transitions of <sup>13</sup>C isotopologues of *cis*-1-naphthol.  $\Delta v^a$  is the difference between observed and calculated frequencies.

| J'  | K <sub>a</sub> ' | K <sub>c</sub> ' | J'' | K <sub>a</sub> '' | K <sub>c</sub> '' | $\nu_{\text{Exp}}/$<br>MHz | $\Delta v^a/$<br>MHz |
|-----|------------------|------------------|-----|-------------------|-------------------|----------------------------|----------------------|
| C1  |                  |                  |     |                   |                   |                            |                      |
| 2   | 1                | 1                | 1   | 1                 | 0                 | 4069.750                   | 0.000                |
| 3   | 0                | 3                | 2   | 0                 | 2                 | 5070.468                   | 0.007                |
| 3   | 1                | 2                | 2   | 1                 | 1                 | 6016.128                   | -0.020               |
| 4   | 1                | 4                | 3   | 1                 | 3                 | 6318.845                   | -0.003               |
| C2  |                  |                  |     |                   |                   |                            |                      |
| 2   | 0                | 2                | 1   | 0                 | 1                 | 3523.205                   | -0.010               |
| 2   | 1                | 1                | 1   | 1                 | 0                 | 4041.101                   | -0.010               |
| 2   | 1                | 2                | 1   | 1                 | 1                 | 3234.272                   | 0.001                |
| 3   | 1                | 3                | 2   | 1                 | 2                 | 4787.668                   | 0.001                |
| 3   | 0                | 3                | 2   | 0                 | 2                 | 5048.596                   | -0.002               |
| 3   | 2                | 1                | 2   | 2                 | 0                 | 5864.477                   | 0.000                |
| 3   | 1                | 2                | 2   | 1                 | 1                 | 5976.626                   | 0.080                |
| C3  |                  |                  |     |                   |                   |                            |                      |
| 2   | 1                | 2                | 1   | 1                 | 1                 | 3235.800                   | -0.001               |
| 2   | 0                | 2                | 1   | 0                 | 1                 | 3524.722                   | 0.000                |
| 2   | 1                | 1                | 1   | 1                 | 0                 | 4052.38                    | -0.002               |
| 3   | 1                | 3                | 2   | 1                 | 2                 | 4787.421                   | 0.002                |
| 3   | 0                | 3                | 2   | 0                 | 2                 | 5043.366                   | 0.000                |
| 3   | 2                | 1                | 2   | 2                 | 0                 | 5888.905                   | -0.002               |
| 3   | 1                | 2                | 2   | 1                 | 1                 | 5989.328                   | -0.000               |
| 4   | 0                | 4                | 3   | 0                 | 3                 | 6439.765                   | -0.007               |
| C4  |                  |                  |     |                   |                   |                            |                      |
| 2   | 1                | 2                | 1   | 1                 | 1                 | 3250.353                   | -0.010               |
| 2   | 0                | 2                | 1   | 0                 | 1                 | 3540.305                   | 0.005                |
| 2   | 1                | 1                | 1   | 1                 | 0                 | 4079.394                   | -0.004               |
| 3   | 1                | 3                | 2   | 1                 | 2                 | 4806.556                   | 0.009                |
| 3   | 0                | 3                | 2   | 0                 | 2                 | 5058.696                   | -0.003               |
| 3   | 2                | 2                | 2   | 2                 | 1                 | 5497.317                   | -0.002               |
| 3   | 1                | 2                | 2   | 1                 | 1                 | 6025.395                   | 0.003                |
| 4   | 0                | 4                | 3   | 0                 | 3                 | 6456.079                   | -0.002               |
| C4a |                  |                  |     |                   |                   |                            |                      |
| 2   | 1                | 2                | 1   | 1                 | 1                 | 3260.108                   | -0.001               |
| 2   | 0                | 2                | 1   | 0                 | 1                 | 3551.162                   | -0.002               |
| 2   | 1                | 1                | 1   | 1                 | 0                 | 4083.796                   | -0.002               |
| 3   | 1                | 3                | 2   | 1                 | 2                 | 4823.105                   | -0.007               |

|     |   |   |   |   |   |          |        |
|-----|---|---|---|---|---|----------|--------|
| 3   | 2 | 2 | 2 | 2 | 1 | 5507.934 | 0.005  |
| 3   | 1 | 2 | 2 | 1 | 1 | 6035.329 | -0.000 |
| 4   | 1 | 4 | 3 | 1 | 3 | 6332.783 | 0.005  |
| C5  |   |   |   |   |   |          |        |
| 2   | 1 | 2 | 1 | 1 | 1 | 3241.183 | -0.007 |
| 2   | 0 | 2 | 1 | 0 | 1 | 3530.640 | 0.002  |
| 2   | 1 | 1 | 1 | 1 | 0 | 4057.083 | -0.002 |
| 3   | 1 | 3 | 2 | 1 | 2 | 4795.947 | 0.000  |
| 3   | 0 | 3 | 2 | 0 | 2 | 5053.449 | 0.003  |
| 3   | 2 | 2 | 2 | 2 | 1 | 5473.714 | 0.008  |
| 3   | 1 | 2 | 2 | 1 | 1 | 5997.152 | -0.004 |
| 4   | 0 | 4 | 3 | 0 | 3 | 6453.439 | -0.002 |
| C6  |   |   |   |   |   |          |        |
| 2   | 0 | 2 | 1 | 0 | 1 | 3510.074 | -0.000 |
| 2   | 1 | 1 | 1 | 1 | 0 | 4022.589 | -0.001 |
| 3   | 1 | 3 | 2 | 1 | 2 | 4770.681 | 0.000  |
| 3   | 0 | 3 | 2 | 0 | 2 | 5032.463 | -0.000 |
| 3   | 1 | 2 | 2 | 1 | 1 | 5950.630 | 0.001  |
| C7  |   |   |   |   |   |          |        |
| 2   | 1 | 2 | 1 | 1 | 1 | 3229.464 | -0.005 |
| 2   | 0 | 2 | 1 | 0 | 1 | 3517.951 | -0.003 |
| 2   | 1 | 1 | 1 | 1 | 0 | 4037.621 | 0.005  |
| 3   | 1 | 3 | 2 | 1 | 2 | 4779.894 | 0.002  |
| 3   | 0 | 3 | 2 | 0 | 2 | 5039.086 | 0.002  |
| 3   | 1 | 2 | 2 | 1 | 1 | 5970.399 | -0.005 |
| 3   | 2 | 2 | 2 | 2 | 1 | 5450.315 | 0.006  |
| C8  |   |   |   |   |   |          |        |
| 2   | 1 | 2 | 1 | 1 | 1 | 3251.607 | 0.001  |
| 2   | 0 | 2 | 1 | 0 | 1 | 3541.851 | 0.003  |
| 2   | 1 | 1 | 1 | 1 | 0 | 4074.887 | 0.001  |
| 3   | 1 | 3 | 2 | 1 | 2 | 4810.055 | 0.002  |
| 3   | 0 | 3 | 2 | 0 | 2 | 5065.703 | -0.001 |
| 3   | 2 | 2 | 2 | 2 | 1 | 5494.866 | -0.002 |
| 3   | 1 | 2 | 2 | 1 | 1 | 6021.397 | -0.000 |
| C8a |   |   |   |   |   |          |        |
| 2   | 1 | 2 | 1 | 1 | 1 | 3263.166 | 0.011  |
| 2   | 0 | 2 | 1 | 0 | 1 | 3554.530 | 0.005  |
| 3   | 1 | 3 | 2 | 1 | 2 | 4828.066 | 0.006  |
| 3   | 0 | 3 | 2 | 0 | 2 | 5086.512 | 0.004  |
| 3   | 1 | 2 | 2 | 1 | 1 | 6039.271 | -0.004 |
| 4   | 1 | 4 | 3 | 1 | 3 | 6339.789 | -0.012 |

---

**Table S7.** Frequencies of rotational transitions of  $^{13}\text{C}$  isotopologues of *trans*-1-naphthol.  $\Delta\nu^a$  is the difference between observed and calculated frequencies.

| J' | K <sub>a</sub> ' | K <sub>c</sub> ' | J'' | K <sub>a</sub> '' | K <sub>c</sub> '' | $\nu_{\text{Exp}}/\text{MHz}$ | $\Delta\nu^a/\text{MHz}$ |
|----|------------------|------------------|-----|-------------------|-------------------|-------------------------------|--------------------------|
| C1 |                  |                  |     |                   |                   |                               |                          |
| 2  | 1                | 2                | 1   | 1                 | 1                 | 3269.839                      | 0.001                    |
| 2  | 0                | 2                | 1   | 0                 | 1                 | 3561.694                      | 0.001                    |
| 2  | 1                | 1                | 1   | 1                 | 0                 | 4100.547                      | 0.001                    |
| 3  | 1                | 3                | 2   | 1                 | 2                 | 4836.292                      | 0.001                    |
| 3  | 0                | 3                | 2   | 0                 | 2                 | 5091.958                      | 0.000                    |
| 3  | 2                | 2                | 2   | 2                 | 1                 | 5527.785                      | -0.002                   |
| 3  | 1                | 2                | 2   | 1                 | 1                 | 6058.148                      | 0.000                    |
| 4  | 1                | 4                | 3   | 1                 | 3                 | 6348.641                      | 0.000                    |
| 4  | 0                | 4                | 3   | 0                 | 3                 | 6499.734                      | 0.000                    |
| C2 |                  |                  |     |                   |                   |                               |                          |
| 2  | 1                | 2                | 1   | 1                 | 1                 | 3251.972                      | 0.000                    |
| 2  | 0                | 2                | 1   | 0                 | 1                 | 3542.433                      | 0.000                    |
| 2  | 1                | 1                | 1   | 1                 | 0                 | 4071.202                      | -0.001                   |
| 3  | 1                | 3                | 2   | 1                 | 2                 | 4811.766                      | 0.001                    |
| 3  | 0                | 3                | 2   | 0                 | 2                 | 5069.925                      | -0.001                   |
| 3  | 2                | 2                | 2   | 2                 | 1                 | 5492.377                      | -0.002                   |
| 3  | 1                | 2                | 2   | 1                 | 1                 | 6017.818                      | 0.002                    |
| 4  | 1                | 4                | 3   | 1                 | 3                 | 6318.697                      | 0.000                    |
| 4  | 0                | 4                | 3   | 0                 | 3                 | 6474.256                      | 0.000                    |
| C3 |                  |                  |     |                   |                   |                               |                          |
| 2  | 1                | 2                | 1   | 1                 | 1                 | 3253.375                      | 0.000                    |
| 2  | 0                | 2                | 1   | 0                 | 1                 | 3543.672                      | 0.001                    |
| 2  | 1                | 1                | 1   | 1                 | 0                 | 4082.334                      | -0.002                   |
| 3  | 1                | 3                | 2   | 1                 | 2                 | 4811.267                      | 0.001                    |
| 3  | 0                | 3                | 2   | 0                 | 2                 | 5064.260                      | 0.000                    |
| 3  | 2                | 2                | 2   | 2                 | 1                 | 5501.783                      | 0.001                    |
| 3  | 2                | 1                | 2   | 2                 | 0                 | 5939.306                      | 0.001                    |
| 3  | 1                | 2                | 2   | 1                 | 1                 | 6030.160                      | 0.000                    |
| 4  | 1                | 4                | 3   | 1                 | 3                 | 6314.995                      | -0.002                   |
| 4  | 0                | 4                | 3   | 0                 | 3                 | 6463.488                      | 0.001                    |
| C4 |                  |                  |     |                   |                   |                               |                          |
| 2  | 1                | 2                | 1   | 1                 | 1                 | 3268.209                      | 0.001                    |
| 2  | 0                | 2                | 1   | 0                 | 1                 | 3559.391                      | 0.000                    |
| 2  | 1                | 1                | 1   | 1                 | 0                 | 4110.011                      | 0.000                    |
| 3  | 1                | 3                | 2   | 1                 | 2                 | 4830.640                      | 0.001                    |
| 3  | 0                | 3                | 2   | 0                 | 2                 | 5079.509                      | 0.000                    |
| 3  | 2                | 2                | 2   | 2                 | 1                 | 5533.661                      | -0.002                   |
| 3  | 2                | 1                | 2   | 2                 | 0                 | 5987.817                      | 0.001                    |



|     |   |   |   |   |   |          |        |
|-----|---|---|---|---|---|----------|--------|
| 3   | 1 | 2 | 2 | 1 | 1 | 6066.888 | 0.000  |
| 4   | 1 | 4 | 3 | 1 | 3 | 6337.451 | -0.001 |
| 4   | 0 | 4 | 3 | 0 | 3 | 6479.799 | 0.001  |
| C4a |   |   |   |   |   |          |        |
| 2   | 1 | 2 | 1 | 1 | 1 | 3278.135 | -0.002 |
| 2   | 0 | 2 | 1 | 0 | 1 | 3570.586 | -0.001 |
| 2   | 1 | 1 | 1 | 1 | 0 | 4114.671 | -0.001 |
| 3   | 1 | 3 | 2 | 1 | 2 | 4847.529 | 0.001  |
| 3   | 0 | 3 | 2 | 0 | 2 | 5101.715 | -0.001 |
| 3   | 2 | 2 | 2 | 2 | 1 | 5544.604 | -0.001 |
| 3   | 2 | 1 | 2 | 2 | 0 | 5987.496 | 0.002  |
| 3   | 1 | 2 | 2 | 1 | 1 | 6077.354 | 0.000  |
| 4   | 1 | 4 | 3 | 1 | 3 | 6362.178 | -0.001 |
| 4   | 0 | 4 | 3 | 0 | 3 | 6510.838 | 0.002  |
| C5  |   |   |   |   |   |          |        |
| 2   | 1 | 2 | 1 | 1 | 1 | 3259.082 | 0.001  |
| 2   | 0 | 2 | 1 | 0 | 1 | 3549.952 | -0.001 |
| 2   | 1 | 1 | 1 | 1 | 0 | 4087.707 | -0.001 |
| 3   | 1 | 3 | 2 | 1 | 2 | 4820.199 | 0.000  |
| 3   | 0 | 3 | 2 | 0 | 2 | 5074.657 | 0.000  |
| 3   | 2 | 2 | 2 | 2 | 1 | 5510.088 | -0.002 |
| 3   | 2 | 1 | 2 | 2 | 0 | 5945.525 | 0.001  |
| 3   | 1 | 2 | 2 | 1 | 1 | 6038.892 | 0.000  |
| 4   | 1 | 4 | 3 | 1 | 3 | 6327.305 | -0.001 |
| 4   | 0 | 4 | 3 | 0 | 3 | 6477.411 | 0.002  |
| C6  |   |   |   |   |   |          |        |
| 2   | 1 | 2 | 1 | 1 | 1 | 3240.063 | 0.000  |
| 2   | 0 | 2 | 1 | 0 | 1 | 3529.528 | 0.000  |
| 2   | 1 | 1 | 1 | 1 | 0 | 4052.926 | -0.001 |
| 3   | 1 | 3 | 2 | 1 | 2 | 4795.052 | 0.000  |
| 3   | 0 | 3 | 2 | 0 | 2 | 5054.120 | -0.001 |
| 3   | 2 | 2 | 2 | 2 | 1 | 5469.741 | -0.001 |
| 3   | 2 | 1 | 2 | 2 | 0 | 5885.364 | 0.001  |
| 3   | 1 | 2 | 2 | 1 | 1 | 5992.234 | 0.000  |
| 4   | 1 | 4 | 3 | 1 | 3 | 6297.835 | -0.001 |
| 4   | 0 | 4 | 3 | 0 | 3 | 6455.410 | 0.002  |
| C7  |   |   |   |   |   |          |        |
| 2   | 1 | 2 | 1 | 1 | 1 | 3247.407 | -0.002 |
| 2   | 0 | 2 | 1 | 0 | 1 | 3537.398 | 0.000  |
| 2   | 1 | 1 | 1 | 1 | 0 | 4068.086 | 0.000  |
| 3   | 1 | 3 | 2 | 1 | 2 | 4804.307 | 0.000  |
| 3   | 0 | 3 | 2 | 0 | 2 | 5060.666 | 0.000  |
| 3   | 2 | 2 | 2 | 2 | 1 | 5486.620 | 0.000  |

|     |   |   |   |   |   |          |        |
|-----|---|---|---|---|---|----------|--------|
| 3   | 2 | 1 | 2 | 2 | 0 | 5912.574 | 0.000  |
| 3   | 1 | 2 | 2 | 1 | 1 | 6012.090 | 0.000  |
| 4   | 1 | 4 | 3 | 1 | 3 | 6308.065 | 0.001  |
| 4   | 0 | 4 | 3 | 0 | 3 | 6461.422 | -0.001 |
| C8  |   |   |   |   |   |          |        |
| 2   | 1 | 2 | 1 | 1 | 1 | 3269.650 | 0.000  |
| 2   | 0 | 2 | 1 | 0 | 1 | 3561.270 | 0.000  |
| 2   | 1 | 1 | 1 | 1 | 0 | 4105.737 | 0.000  |
| 3   | 1 | 3 | 2 | 1 | 2 | 4834.498 | 0.000  |
| 3   | 0 | 3 | 2 | 0 | 2 | 5087.039 | -0.001 |
| 3   | 2 | 2 | 2 | 2 | 1 | 5531.539 | 0.000  |
| 3   | 2 | 1 | 2 | 2 | 0 | 5976.037 | -0.001 |
| 3   | 1 | 2 | 2 | 1 | 1 | 6063.382 | 0.001  |
| 4   | 1 | 4 | 3 | 1 | 3 | 6344.518 | 0.001  |
| 4   | 0 | 4 | 3 | 0 | 3 | 6491.496 | 0.000  |
| C8a |   |   |   |   |   |          |        |
| 2   | 1 | 2 | 1 | 1 | 1 | 3281.250 | -0.002 |
| 2   | 0 | 2 | 1 | 0 | 1 | 3574.049 | -0.001 |
| 3   | 1 | 3 | 2 | 1 | 2 | 4852.614 | 0.000  |
| 3   | 0 | 3 | 2 | 0 | 2 | 5108.030 | 0.000  |
| 3   | 2 | 2 | 2 | 2 | 1 | 5548.588 | 0.001  |
| 3   | 2 | 1 | 2 | 2 | 0 | 5989.143 | -0.001 |
| 3   | 1 | 2 | 2 | 1 | 1 | 6081.364 | 0.000  |
| 4   | 1 | 4 | 3 | 1 | 3 | 6369.417 | 0.002  |
| 4   | 0 | 4 | 3 | 0 | 3 | 6519.511 | -0.001 |

**Table S8.** Frequencies of rotational transitions of  $^{13}\text{C}$  isotopologues of *cis*-2-naphthol.  $\Delta\nu^a$  is the difference between observed and calculated frequencies.

| J'  | K <sub>a</sub> ' | K <sub>c</sub> ' | J'' | K <sub>a</sub> '' | K <sub>c</sub> '' | $\nu_{\text{Exp}}/$<br>MHz | $\Delta\nu^a/$<br>MHz |
|-----|------------------|------------------|-----|-------------------|-------------------|----------------------------|-----------------------|
| C1  |                  |                  |     |                   |                   |                            |                       |
| 2   | 1                | 1                | 2   | 0                 | 0                 | 2 2389.725                 | 0.017                 |
| 4   | 1                | 3                | 4   | 0                 | 0                 | 4 3172.361                 | -0.006                |
| 1   | 1                | 1                | 0   | 0                 | 0                 | 0 3467.968                 | -0.005                |
| 4   | 0                | 4                | 3   | 1                 | 1                 | 3 4128.181                 | 0.016                 |
| 2   | 1                | 2                | 1   | 0                 | 0                 | 1 4743.803                 | 0.000                 |
| 5   | 0                | 5                | 4   | 1                 | 1                 | 4 5752.625                 | -0.012                |
| 3   | 1                | 3                | 2   | 0                 | 0                 | 2 5931.802                 | 0.000                 |
| C2  |                  |                  |     |                   |                   |                            |                       |
| 4   | 1                | 3                | 4   | 0                 | 0                 | 4 3175.116                 | -0.010                |
| 1   | 1                | 1                | 0   | 0                 | 0                 | 0 3484.749                 | -0.001                |
| 5   | 1                | 4                | 5   | 0                 | 0                 | 5 3797.195                 | 0.007                 |
| 4   | 0                | 4                | 3   | 1                 | 1                 | 3 4080.998                 | -0.009                |
| 2   | 1                | 2                | 1   | 0                 | 0                 | 1 4757.210                 | 0.006                 |
| 5   | 0                | 5                | 4   | 1                 | 1                 | 4 5701.479                 | 0.007                 |
| 3   | 1                | 3                | 2   | 0                 | 0                 | 2 5942.966                 | -0.003                |
| C3  |                  |                  |     |                   |                   |                            |                       |
| 4   | 1                | 3                | 4   | 0                 | 0                 | 4 3164.651                 | 0.010                 |
| 1   | 1                | 1                | 0   | 0                 | 0                 | 0 3462.809                 | 0.000                 |
| 5   | 1                | 4                | 5   | 0                 | 0                 | 5 3794.545                 | -0.006                |
| 4   | 0                | 4                | 3   | 1                 | 1                 | 3 4106.272                 | 0.000                 |
| 3   | 0                | 3                | 2   | 0                 | 0                 | 2 4319.604                 | 0.001                 |
| 2   | 1                | 2                | 1   | 0                 | 0                 | 1 4734.495                 | -0.007                |
| 3   | 1                | 3                | 2   | 0                 | 0                 | 2 5918.868                 | 0.003                 |
| C4  |                  |                  |     |                   |                   |                            |                       |
| 2   | 1                | 1                | 2   | 0                 | 0                 | 2 2367.779                 | 0.012                 |
| 4   | 1                | 3                | 4   | 0                 | 0                 | 4 3160.057                 | 0.012                 |
| 1   | 1                | 1                | 0   | 0                 | 0                 | 0 3442.654                 | -0.011                |
| 5   | 1                | 4                | 5   | 0                 | 0                 | 5 3803.144                 | -0.009                |
| 4   | 0                | 4                | 3   | 1                 | 1                 | 3 4154.077                 | -0.003                |
| 3   | 0                | 3                | 2   | 0                 | 0                 | 2 4334.256                 | -0.008                |
| 2   | 1                | 2                | 1   | 0                 | 0                 | 1 4717.144                 | -0.004                |
| 5   | 0                | 5                | 4   | 1                 | 1                 | 4 5776.494                 | 0.008                 |
| 3   | 1                | 3                | 2   | 0                 | 0                 | 2 5903.128                 | 0.005                 |
| C4a |                  |                  |     |                   |                   |                            |                       |
| 2   | 1                | 1                | 2   | 0                 | 0                 | 2 2397.935                 | 0.013                 |
| 3   | 1                | 2                | 3   | 0                 | 0                 | 3 2716.329                 | 0.007                 |
| 4   | 1                | 3                | 4   | 0                 | 0                 | 4 3179.710                 | -0.010                |

|    |   |   |   |   |   |   |          |        |
|----|---|---|---|---|---|---|----------|--------|
|    | 1 | 1 | 1 | 0 | 0 | 0 | 3478.498 | -0.001 |
|    | 4 | 0 | 4 | 3 | 1 | 3 | 4128.773 | -0.006 |
|    | 2 | 1 | 2 | 1 | 0 | 1 | 4756.507 | -0.002 |
|    | 5 | 0 | 5 | 4 | 1 | 4 | 5756.096 | 0.009  |
|    | 3 | 1 | 3 | 2 | 0 | 2 | 5946.697 | -0.005 |
| C5 |   |   |   |   |   |   |          |        |
|    | 3 | 0 | 3 | 2 | 1 | 2 | 2486.093 | -0.009 |
|    | 3 | 1 | 2 | 3 | 0 | 3 | 2701.819 | -0.005 |
|    | 4 | 1 | 3 | 4 | 0 | 4 | 3162.801 | -0.012 |
|    | 1 | 1 | 1 | 0 | 0 | 0 | 3459.924 | 0.007  |
|    | 5 | 1 | 4 | 5 | 0 | 5 | 3793.203 | 0.009  |
|    | 4 | 0 | 4 | 3 | 1 | 3 | 4107.109 | 0.006  |
|    | 2 | 1 | 2 | 1 | 0 | 1 | 4731.159 | 0.006  |
|    | 5 | 0 | 5 | 4 | 1 | 4 | 5725.785 | 0.000  |
|    | 4 | 0 | 4 | 3 | 0 | 3 | 5703.776 | 0.001  |
|    | 3 | 1 | 3 | 2 | 0 | 2 | 5915.025 | -0.007 |
| C6 |   |   |   |   |   |   |          |        |
|    | 1 | 1 | 0 | 1 | 0 | 1 | 2214.260 | 0.008  |
|    | 2 | 1 | 1 | 2 | 0 | 2 | 2406.207 | -0.009 |
|    | 3 | 1 | 2 | 3 | 0 | 3 | 2715.161 | 0.011  |
|    | 4 | 1 | 3 | 4 | 0 | 4 | 3163.862 | -0.006 |
|    | 1 | 1 | 1 | 0 | 0 | 0 | 3479.655 | -0.007 |
|    | 5 | 1 | 4 | 5 | 0 | 5 | 3776.733 | 0.000  |
|    | 4 | 0 | 4 | 3 | 1 | 3 | 4038.624 | -0.014 |
|    | 3 | 0 | 3 | 2 | 0 | 2 | 4292.009 | -0.011 |
|    | 2 | 1 | 2 | 1 | 0 | 1 | 4745.078 | 0.010  |
|    | 5 | 0 | 5 | 4 | 1 | 4 | 5650.256 | 0.018  |
|    | 3 | 1 | 3 | 2 | 0 | 2 | 5924.750 | -0.005 |
| C7 |   |   |   |   |   |   |          |        |
|    | 3 | 1 | 2 | 3 | 0 | 3 | 2705.361 | -0.008 |
|    | 4 | 1 | 3 | 4 | 0 | 4 | 3158.752 | 0.010  |
|    | 1 | 1 | 1 | 0 | 0 | 0 | 3466.034 | 0.006  |
|    | 5 | 1 | 4 | 5 | 0 | 5 | 3778.291 | -0.004 |
|    | 4 | 0 | 4 | 3 | 1 | 3 | 4062.688 | 0.001  |
|    | 2 | 1 | 2 | 1 | 0 | 1 | 4732.159 | 0.001  |
|    | 3 | 1 | 3 | 2 | 0 | 2 | 5911.975 | -0.004 |
| C8 |   |   |   |   |   |   |          |        |
|    | 3 | 1 | 2 | 3 | 0 | 3 | 2694.877 | 0.016  |
|    | 4 | 1 | 3 | 4 | 0 | 4 | 3160.402 | -0.014 |
|    | 1 | 1 | 1 | 0 | 0 | 0 | 3449.820 | 0.001  |
|    | 5 | 1 | 4 | 5 | 0 | 5 | 3797.328 | 0.000  |
|    | 4 | 0 | 4 | 3 | 1 | 3 | 4130.874 | 0.008  |
|    | 6 | 1 | 5 | 6 | 0 | 6 | 4623.745 | 0.002  |

|     |   |   |   |   |   |   |          |        |
|-----|---|---|---|---|---|---|----------|--------|
|     | 2 | 1 | 2 | 1 | 0 | 1 | 4722.426 | 0.001  |
|     | 5 | 0 | 5 | 4 | 1 | 4 | 5751.089 | -0.005 |
|     | 3 | 1 | 3 | 2 | 0 | 2 | 5907.089 | -0.003 |
| C8a |   |   |   |   |   |   |          |        |
|     | 2 | 1 | 1 | 2 | 0 | 2 | 2401.077 | -0.002 |
|     | 3 | 1 | 2 | 3 | 0 | 3 | 2719.289 | 0.008  |
|     | 4 | 1 | 3 | 4 | 0 | 4 | 3182.335 | -0.004 |
|     | 1 | 1 | 1 | 0 | 0 | 0 | 3482.455 | 0.000  |
|     | 4 | 0 | 4 | 3 | 1 | 3 | 4128.181 | 0.003  |
|     | 2 | 1 | 2 | 1 | 0 | 1 | 4761.165 | -0.001 |
|     | 3 | 1 | 3 | 2 | 0 | 2 | 5952.084 | 0.000  |

---

**Table S9.** Frequencies of rotational transitions of  $^{13}\text{C}$  isotopologues of *trans*-2-naphthol.  $\Delta\nu^a$  is the difference between observed and calculated frequencies.

| J'  | K <sub>a</sub> ' | K <sub>c</sub> ' | J'' | K <sub>a</sub> '' | K <sub>c</sub> '' | $\nu_{\text{Exp}}/$<br>MHz | $\Delta\nu^a/$<br>MHz |
|-----|------------------|------------------|-----|-------------------|-------------------|----------------------------|-----------------------|
| C1  |                  |                  |     |                   |                   |                            |                       |
| 4   | 1                | 3                | 4   | 0                 | 4                 | 3171.826                   | -0.001                |
| 1   | 1                | 1                | 0   | 0                 | 0                 | 3464.708                   | 0.005                 |
| 2   | 1                | 2                | 1   | 0                 | 1                 | 4741.258                   | 0.002                 |
| 5   | 2                | 3                | 5   | 1                 | 4                 | 5362.168                   | -0.001                |
| 3   | 1                | 3                | 2   | 0                 | 2                 | 5929.754                   | -0.003                |
| C2  |                  |                  |     |                   |                   |                            |                       |
| 4   | 1                | 3                | 4   | 0                 | 4                 | 3174.484                   | 0.002                 |
| 4   | 0                | 4                | 3   | 1                 | 3                 | 4090.654                   | -0.001                |
| 2   | 1                | 2                | 1   | 0                 | 1                 | 4754.524                   | -0.011                |
| 3   | 1                | 3                | 2   | 0                 | 2                 | 5940.797                   | 0.008                 |
| C3  |                  |                  |     |                   |                   |                            |                       |
| 2   | 1                | 1                | 2   | 0                 | 2                 | 2383.807                   | -0.012                |
| 4   | 1                | 3                | 4   | 0                 | 4                 | 3163.991                   | 0.003                 |
| 1   | 1                | 1                | 0   | 0                 | 0                 | 3459.285                   | 0.000                 |
| 2   | 1                | 2                | 1   | 0                 | 1                 | 4731.714                   | 0.010                 |
| 5   | 2                | 3                | 5   | 1                 | 4                 | 5362.957                   | 0.002                 |
| 3   | 1                | 3                | 2   | 0                 | 2                 | 5916.555                   | -0.007                |
| C4  |                  |                  |     |                   |                   |                            |                       |
| 3   | 1                | 2                | 3   | 0                 | 3                 | 2687.666                   | 0.003                 |
| 1   | 1                | 1                | 0   | 0                 | 0                 | 3439.034                   | -0.010                |
| 4   | 0                | 4                | 3   | 1                 | 3                 | 4164.006                   | 0.011                 |
| 2   | 1                | 2                | 1   | 0                 | 1                 | 4714.223                   | -0.008                |
| 5   | 2                | 3                | 5   | 1                 | 4                 | 5287.898                   | 0.003                 |
| 5   | 0                | 5                | 4   | 1                 | 4                 | 5787.189                   | -0.008                |
| 3   | 1                | 3                | 2   | 0                 | 2                 | 5900.683                   | 0.008                 |
| C4a |                  |                  |     |                   |                   |                            |                       |
| 1   | 1                | 1                | 0   | 0                 | 0                 | 3475.018                   | -0.002                |
| 5   | 1                | 4                | 5   | 0                 | 5                 | 3814.894                   | 0.000                 |
| 2   | 1                | 2                | 1   | 0                 | 1                 | 4753.735                   | 0.004                 |
| 3   | 1                | 3                | 2   | 0                 | 2                 | 5944.413                   | -0.002                |
| C5  |                  |                  |     |                   |                   |                            |                       |
| 3   | 1                | 2                | 3   | 0                 | 3                 | 2699.485                   | 0.002                 |
| 1   | 1                | 1                | 0   | 0                 | 0                 | 3456.552                   | -0.012                |
| 4   | 0                | 4                | 3   | 1                 | 3                 | 4116.584                   | -0.001                |
| 2   | 1                | 2                | 1   | 0                 | 1                 | 4728.508                   | 0.009                 |
| C6  |                  |                  |     |                   |                   |                            |                       |
| 4   | 1                | 3                | 4   | 0                 | 4                 | 3163.142                   | -0.010                |

|     |   |   |   |   |   |          |        |
|-----|---|---|---|---|---|----------|--------|
| 1   | 1 | 1 | 0 | 0 | 0 | 3476.291 | 0.004  |
| 5   | 1 | 4 | 5 | 0 | 5 | 3778.448 | 0.007  |
| 4   | 0 | 4 | 3 | 1 | 3 | 4048.277 | -0.003 |
| 2   | 1 | 2 | 1 | 0 | 1 | 4742.411 | -0.003 |
| 4   | 2 | 2 | 4 | 1 | 3 | 5647.609 | -0.002 |
| 3   | 1 | 3 | 2 | 0 | 2 | 5922.605 | 0.004  |
| C7  |   |   |   |   |   |          |        |
| 3   | 1 | 2 | 3 | 0 | 3 | 2702.907 | 0.006  |
| 1   | 1 | 1 | 0 | 0 | 0 | 3462.492 | -0.015 |
| 5   | 1 | 4 | 5 | 0 | 5 | 3780.186 | 0.001  |
| 2   | 1 | 2 | 1 | 0 | 1 | 4729.345 | -0.022 |
| 3   | 2 | 1 | 3 | 1 | 2 | 5832.618 | 0.004  |
| 3   | 1 | 3 | 2 | 0 | 2 | 5909.708 | 0.020  |
| C8  |   |   |   |   |   |          |        |
| 4   | 1 | 3 | 4 | 0 | 4 | 3160.054 | 0.000  |
| 1   | 1 | 1 | 0 | 0 | 0 | 3446.433 | -0.002 |
| 2   | 1 | 2 | 1 | 0 | 1 | 4719.799 | 0.004  |
| 3   | 1 | 3 | 2 | 0 | 2 | 5904.970 | -0.002 |
| C8a |   |   |   |   |   |          |        |
| 3   | 1 | 2 | 3 | 0 | 3 | 2716.954 | 0.004  |
| 4   | 1 | 3 | 4 | 0 | 4 | 3181.767 | -0.002 |
| 1   | 1 | 1 | 0 | 0 | 0 | 3479.101 | -0.001 |
| 2   | 1 | 2 | 1 | 0 | 1 | 4758.540 | -0.004 |
| 3   | 1 | 3 | 2 | 0 | 2 | 5949.967 | 0.003  |

---

## Rotational and Centrifugal Distortion Constants for $^{13}\text{C}$ Isotopologues

**Table S10.** Experimental rotational constants and centrifugal distortion constants for  $^{13}\text{C}$  Isotopologues of *cis*-1-naphthol.

|                               | $^{13}\text{C-1}$ | $^{13}\text{C-2}$ | $^{13}\text{C-3}$ | $^{13}\text{C-4}$ | $^{13}\text{C-4a}$ |
|-------------------------------|-------------------|-------------------|-------------------|-------------------|--------------------|
| A / MHz                       | 1944.27(16)       | 1947.050(26)      | 1928.5610(90)     | 1919.490(25)      | 1940.959(41)       |
| B / MHz                       | 1119.6924(67)     | 1111.1331(17)     | 1115.16790(63)    | 1123.4788(15)     | 1123.9108(10)      |
| C / MHz                       | 710.6501(69)      | 707.7129(17)      | 706.87770(60)     | 708.9618(15)      | 712.06640(92)      |
| $\Delta_J$ / kHz              | [0.0136]          | [0.0136]          | [0.0136]          | [0.0136]          | [0.0135]           |
| $\Delta_{JK}$ / kHz           | [0.0409]          | [0.0409]          | [0.0409]          | [0.0409]          | [0.0408]           |
| $\delta_J$                    | [-0.006]          | [-0.006]          | [-0.006]          | [-0.006]          | [-0.006]           |
| $\delta_K$                    | [-0.0018]         | [-0.0018]         | [-0.0018]         | [-0.0018]         | [-0.0018]          |
| N                             | 4                 | 7                 | 8                 | 8                 | 7                  |
| $\sigma$ / kHz                | 14.4              | 6.5               | 2.4               | 5.7               | 3.9                |
| $\Delta$ / amu $\text{\AA}^2$ | -0.14(2)          | -0.2920(9)        | -0.2908(9)        | -0.2784(9)        | -0.299(7)          |
|                               | $^{13}\text{C-5}$ | $^{13}\text{C-6}$ | $^{13}\text{C-7}$ | $^{13}\text{C-8}$ | $^{13}\text{C-8a}$ |
| A / MHz                       | 1935.954(21)      | 1947.0190(65)     | 1938.910(22)      | 1932.3160(78)     | 1946.112(49)       |
| B / MHz                       | 1116.2582(12)     | 1105.69790(27)    | 1110.4222(11)     | 1121.63140(41)    | 1124.3530(31)      |
| C / MHz                       | 708.3112(12)      | 705.49660(32)     | 706.3493(10)      | 709.99190(39)     | 712.9342(18)       |
| $\Delta_J$ / kHz              | [0.0135]          | [0.0136]          | [0.0134]          | [0.0134]          | [0.0136]           |
| $\Delta_{JK}$ / kHz           | [0.0408]          | [0.0409]          | [0.0406]          | [0.0404]          | [0.0409]           |
| $\delta_J$                    | [-0.006]          | [-0.006]          | [-0.006]          | [-0.006]          | [-0.006]           |
| $\delta_K$                    | [-0.0019]         | [-0.0018]         | [-0.0019]         | [-0.0018]         | [-0.0018]          |
| N                             | 8                 | 5                 | 7                 | 7                 | 6                  |
| $\sigma$ / kHz                | 4.1               | 0.7               | 3.8               | 1.4               | 7.8                |
| $\Delta$ / amu $\text{\AA}^2$ | -0.294(3)         | -0.1369(9)        | -0.294(3)         | -0.306(1)         | -0.299(7)          |



**Table S11.** Experimental rotational constants and centrifugal distortion constants for  $^{13}\text{C}$  isotopologues of *trans*-1-naphthol.

|                               | $^{13}\text{C-1}$ | $^{13}\text{C-2}$ | $^{13}\text{C-3}$ | $^{13}\text{C-4}$ | $^{13}\text{C-4a}$ |
|-------------------------------|-------------------|-------------------|-------------------|-------------------|--------------------|
| A / MHz                       | 1938.1110(43)     | 1941.7080(49)     | 1923.4450(36)     | 1914.1280(21)     | 1935.5150(38)      |
| B / MHz                       | 1128.97530(26)    | 1120.20480(30)    | 1124.20450(25)    | 1132.72820(15)    | 1133.23540(27)     |
| C / MHz                       | 713.62120(21)     | 710.58920(24)     | 709.72380(21)     | 711.82680(13)     | 714.967100(22)     |
| $\Delta_J$ / kHz              | [0.0170]          | [0.0170]          | [0.0170]          | [0.0170]          | [0.0170]           |
| $\Delta_{JK}$ / kHz           | [0.021]           | [0.021]           | [0.021]           | [0.021]           | [0.021]            |
| $\Delta_K$ / kHz              | [0.070]           | [0.070]           | [0.070]           | [0.070]           | [0.070]            |
| $\delta_J$ / kHz              | [0.0059]          | [0.0059]          | [0.0059]          | [0.0059]          | [0.0059]           |
| $\delta_K$ / kHz              | [0.023]           | [0.023]           | [0.023]           | [0.023]           | [0.023]            |
| N                             | 9                 | 9                 | 10                | 10                | 10                 |
| $\sigma$ / kHz                | 1.1               | 1.2               | 1.2               | 0.7               | 1.3                |
| $\Delta$ / amu $\text{\AA}^2$ | -0.2131(6)        | -0.2130(7)        | -0.2118(5)        | -0.2119(3)        | -0.2134(6)         |
|                               | $^{13}\text{C-5}$ | $^{13}\text{C-6}$ | $^{13}\text{C-7}$ | $^{13}\text{C-8}$ | $^{13}\text{C-8a}$ |
| A / MHz                       | 1930.4220(34)     | 1941.5720(27)     | 1933.6590(21)     | 1927.0710(20)     | 1940.8140(36)      |
| B / MHz                       | 1125.50560(24)    | 1114.84010(18)    | 1119.60650(15)    | 1130.94520(14)    | 1133.66830(27)     |
| C / MHz                       | 711.19190(19)     | 708.40780(15)     | 709.26740(12)     | 712.90180(12)     | 715.86120(21)      |
| $\Delta_J$ / kHz              | [0.0170]          | [0.0170]          | [0.0170]          | [0.0170]          | [0.0170]           |
| $\Delta_{JK}$ / kHz           | [0.021]           | [0.021]           | [0.021]           | [0.021]           | [0.021]            |
| $\Delta_K$ / kHz              | [0.070]           | [0.070]           | [0.070]           | [0.070]           | [0.070]            |
| $\delta_J$ / kHz              | [0.0059]          | [0.0059]          | [0.0059]          | [0.0059]          | [0.0059]           |
| $\delta_K$ / kHz              | [0.023]           | [0.023]           | [0.023]           | [0.023]           | [0.023]            |
| N                             | 10                | 10                | 10                | 10                | 9                  |
| $\sigma$ / kHz                | 1.1               | 0.9               | 0.7               | 0.7               | 1.1                |
| $\Delta$ / amu $\text{\AA}^2$ | -0.2127(5)        | -0.2122(4)        | -0.2121(3)        | -0.2126(3)        | -0.2128(5)         |

**Table S12.** Experimental rotational constants and centrifugal distortion constants for  $^{13}\text{C}$  isotopologues of *cis*-2-naphthol.

|                               | $^{13}\text{C-1}$ | $^{13}\text{C-2}$ | $^{13}\text{C-3}$ | $^{13}\text{C-4}$ | $^{13}\text{C-4a}$ |
|-------------------------------|-------------------|-------------------|-------------------|-------------------|--------------------|
| A / MHz                       | 2830.202(11)      | 2848.666(11)      | 2827.105(11)      | 2805.5672(74)     | 2839.6381(61)      |
| B                             | 823.2344(26)      | 818.8827(19)      | 820.0495(24)      | 824.2133(13)      | 824.2505(14)       |
| C                             | 637.9165(25)      | 636.2285(19)      | 635.8482(21)      | 637.2430(13)      | 639.0066(13)       |
| $\Delta_J$ / kHz              | [0.0130]          | [0.0130]          | [0.0130]          | [0.0130]          | [0.0130]           |
| $\Delta_K$                    | [0.140]           | [0.140]           | [0.140]           | [0.140]           | [0.140]            |
| $\delta_J$                    | [0.00410]         | [0.00410]         | [0.00410]         | [0.00410]         | [0.00410]          |
| N                             | 7                 | 7                 | 7                 | 9                 | 8                  |
| $\sigma$ / kHz                | 10.3              | 6.8               | 5.4               | 8.5               | 7.7                |
| $\Delta$ / amu $\text{\AA}^2$ | -0.229(3)         | -0.230(3)         | -0.230(3)         | -0.229(2)         | -0.228(2)          |
|                               | $^{13}\text{C-5}$ | $^{13}\text{C-6}$ | $^{13}\text{C-7}$ | $^{13}\text{C-8}$ | $^{13}\text{C-8a}$ |
| A / MHz                       | 2824.4429(43)     | 2847.1016(55)     | 2833.107(10)      | 2813.658(10)      | 2843.242(11)       |
| B                             | 819.89499(74)     | 813.1838(10)      | 814.9305(27)      | 821.9521(18)      | 824.5297(53)       |
| C                             | 635.61953(76)     | 632.7051(11)      | 633.0662(24)      | 636.3053(18)      | 639.3568(14)       |
| $\Delta_J$ / kHz              | [0.0130]          | [0.0130]          | [0.0130]          | [0.0130]          | [0.0130]           |
| $\Delta_{JK}$                 | [0.140]           | [0.140]           | [0.140]           | [0.140]           | [0.140]            |
| $\delta_J$                    | [0.00410]         | [0.00410]         | [0.00410]         | [0.00410]         | [0.00410]          |
| N                             | 10                | 11                | 7                 | 9                 | 7                  |
| $\sigma$ / kHz                | 7.1               | 9.9               | 5.6               | 7.7               | 3.6                |
| $\Delta$ / amu $\text{\AA}^2$ | -0.129(1)         | -0.220(1)         | -0.230(4)         | -0.229(2)         | -0.228(4)          |

**Table S13.** Experimental rotational constants and centrifugal distortion constants for  $^{13}\text{C}$  isotopologues of *trans*-2-naphthol.

|                               | $^{13}\text{C-1}$ | $^{13}\text{C-2}$ | $^{13}\text{C-3}$ | $^{13}\text{C-4}$ | $^{13}\text{C-4a}$ |
|-------------------------------|-------------------|-------------------|-------------------|-------------------|--------------------|
| A / MHz                       | 2826.4266(13)     | 2844.7845(71)     | 2823.0746(29)     | 2801.4505(33)     | 2835.6648(58)      |
| B                             | 824.12060(87)     | 819.7675(17)      | 820.9595(20)      | 825.1224(12)      | 825.0998(23)       |
| C                             | 638.27650(66)     | 636.5836(14)      | 636.2098(14)      | 637.5932(11)      | 639.3556(17)       |
| $\Delta_J$ / kHz              | [0.0130]          | [0.0130]          | [0.0130]          | [0.0130]          | [0.0130]           |
| $\Delta_K$                    | [0.140]           | [0.140]           | [0.140]           | [0.140]           | [0.140]            |
| $\delta_K$                    | [0.00410]         | [0.00410]         | [0.00410]         | [0.00410]         | [0.00410]          |
| N                             | 5                 | 4                 | 6                 | 7                 | 4                  |
| $\sigma$ / kHz                | 2.7               | 6.8               | 7.2               | 7.6               | 2.4                |
| $\Delta$ / amu $\text{\AA}^2$ | -0.252(1)         | -0.249(2)         | -0.254(2)         | -0.253(2)         | -0.278(3)          |
|                               | $^{13}\text{C-5}$ | $^{13}\text{C-6}$ | $^{13}\text{C-7}$ | $^{13}\text{C-8}$ | $^{13}\text{C-8a}$ |
| A / MHz                       | 2824.4429(63)     | 2843.2229(20)     | 2829.0763(53)     | 2809.7545(59)     | 2839.3825(11)      |
| B                             | 819.89499(21)     | 814.06279(75)     | 815.8434(34)      | 822.9028(30)      | 825.4301(27)       |
| C                             | 635.61953(16)     | 633.06372(69)     | 633.4304(28)      | 636.6802(17)      | 639.7204(15)       |
| $\Delta_J$ / kHz              | [0.0130]          | [0.0130]          | [0.0130]          | [0.0130]          | [0.0130]           |
| $\Delta_{JK}$                 | [0.140]           | [0.140]           | [0.140]           | [0.140]           | [0.140]            |
| $\delta_K$                    | [0.00410]         | [0.00410]         | [0.00410]         | [0.00410]         | [0.00410]          |
| N                             | 5                 | 7                 | 6                 | 4                 | 5                  |
| $\sigma$ / kHz                | 8.4               | 5.5               | 13.8              | 2.4               | 3.0                |
| $\Delta$ / amu $\text{\AA}^2$ | -0.2286(4)        | -0.253(1)         | -0.249(4)         | -0.236(3)         | -0.251(3)          |

## Structural Parameters

**Table S14.** Substitution ( $r_s$ ), semi-experimental ( $r_{se}$ ), and theoretical structural parameters for *cis*-1-naphthol

| <b>Bond length</b> | $r_s$    | $r_{se}$ | MP2   | B3LYP-D3 | <b>Bond angle</b> | $r_s$    | $r_{se}$  | MP2    | B3LYP-D3 |
|--------------------|----------|----------|-------|----------|-------------------|----------|-----------|--------|----------|
| <b>r(1-2)</b>      | 1.340(8) | 1.40(3)  | 1.379 | 1.373    | <b>∠(2-1-8a)</b>  | 121.7(6) | 121.0(24) | 120.83 | 120.41   |
| <b>r(1-8a)</b>     | 1.421(5) | 1.38(3)  | 1.421 | 1.424    | <b>∠(1-2-3)</b>   | 120.1(3) | 119.2(22) | 120.27 | 120.44   |
| <b>r(2-3)</b>      | 1.421(7) | 1.38(4)  | 1.406 | 1.406    | <b>∠(2-3-4)</b>   | 120.7(1) | 121.4(22) | 120.62 | 120.15   |
| <b>r(4a-8a)</b>    | 1.426(7) | 1.41(2)  | 1.433 | 1.429    | <b>∠(3-4-4a)</b>  | 119.3(2) | 120.9(21) | 120.15 | 121.11   |
| <b>r(3-4)</b>      | 1.375(3) | 1.35(5)  | 1.377 | 1.370    | <b>∠(4-4a-8a)</b> | 119.9(5) | 118.2(22) | 119.75 | 118.44   |
| <b>r(4-4a)</b>     | 1.407(5) | 1.43(6)  | 1.413 | 1.414    | <b>∠(5-4a-8a)</b> | 118.7(5) | 120.0(19) | 118.40 | 119.22   |
| <b>r(4a-5)</b>     | 1.440(5) | 1.53(3)  | 1.415 | 1.415    | <b>∠(7-8-8a)</b>  | 121.3(2) | 120.5(23) | 120.13 | 120.87   |
| <b>r(5-6)</b>      | 1.380(4) | 1.21(4)  | 1.377 | 1.370    | <b>∠(1-8a-8)</b>  | 123.9(5) | 122.4(22) | 121.87 | 122.08   |
| <b>r(6-7)</b>      | 1.411(6) | 1.50(40) | 1.409 | 1.409    | <b>∠(4a-5-6)</b>  | 121.2(2) | 120.1(21) | 120.99 | 120.86   |
| <b>r(7-8)</b>      | 1.383(3) | 1.40(4)  | 1.379 | 1.371    | <b>∠(5-6-7)</b>   | 120.0(1) | 120.1(22) | 120.18 | 120.01   |
| <b>r(8-8a)</b>     | 1.437(4) | 1.39(3)  | 1.415 | 1.415    | <b>∠(6-7-8)</b>   | 120.4(1) | 120.9(22) | 120.55 | 120.58   |

**Table S15.** Substitution ( $r_s$ ), semi-experimental ( $r_{se}$ ), and theoretical structural parameters for *trans*-1-naphthol

| <b>Bond length</b> | $r_s$    | $r_{se}$ | MP2   | B3LYP-D3 | <b>Bond angle</b> | $r_s$    | $r_{se}$ | MP2    | B3LYP-D3 |
|--------------------|----------|----------|-------|----------|-------------------|----------|----------|--------|----------|
| <b>r(1-2)</b>      | 1.364(5) | 1.39(2)  | 1.378 | 1.371    | <b>∠(2-1-8a)</b>  | 121.4(3) | 120.6(6) | 120.83 | 120.41   |
| <b>r(1-8a)</b>     | 1.392(1) | 1.46(4)  | 1.419 | 1.412    | <b>∠(1-2-3)</b>   | 119.4(2) | 120.5(5) | 120.27 | 120.44   |
| <b>r(2-3)</b>      | 1.423(6) | 1.39(2)  | 1.410 | 1.413    | <b>∠(2-3-4)</b>   | 120.5(1) | 120.9(4) | 120.62 | 120.15   |
| <b>r(4a-8a)</b>    | 1.414(4) | 1.39(2)  | 1.429 | 1.428    | <b>∠(3-4-4a)</b>  | 119.4(1) | 120.9(4) | 120.15 | 121.11   |
| <b>r(3-4)</b>      | 1.379(3) | 1.36(1)  | 1.376 | 1.369    | <b>∠(4-4a-8a)</b> | 119.9(3) | 120.7(6) | 119.75 | 118.44   |
| <b>r(4-4a)</b>     | 1.408(4) | 1.42(2)  | 1.415 | 1.414    | <b>∠(5-4a-8a)</b> | 119.1(2) | 117.3(6) | 118.40 | 119.22   |
| <b>r(4a-5)</b>     | 1.436(4) | 1.41(2)  | 1.415 | 1.414    | <b>∠(7-8-8a)</b>  | 120.7(1) | 118.8(6) | 120.13 | 120.45   |
| <b>r(5-6)</b>      | 1.381(4) | 1.37(2)  | 1.378 | 1.370    | <b>∠(1-8a-8)</b>  | 121.9(3) | 120.6(6) | 121.87 | 122.08   |
| <b>r(6-7)</b>      | 1.410(6) | 1.42(2)  | 1.410 | 1.412    | <b>∠(4a-5-6)</b>  | 120.8(2) | 120.8(9) | 120.99 | 120.86   |
| <b>r(7-8)</b>      | 1.380(2) | 1.37(1)  | 1.379 | 1.370    | <b>∠(5-6-7)</b>   | 120.3(1) | 120.3(4) | 120.18 | 120.01   |
| <b>r(8-8a)</b>     | 1.392(1) | 1.38(2)  | 1.414 | 1.417    | <b>∠(6-7-8)</b>   | 120.5(1) | 120.3(5) | 120.55 | 120.58   |

**Table S16.** Substitution ( $r_s$ ), semi-experimental ( $r_{se}$ ), and theoretical structural parameters for *cis*-2-naphthol

| <b>Bond length</b> | $r_s$    | $r_{se}$ | MP2   | B3LYP-D3 | <b>Bond angle</b> | $r_s$    | $r_{se}$ | MP2     | B3LYP-D3 |
|--------------------|----------|----------|-------|----------|-------------------|----------|----------|---------|----------|
| r(1-2)             | 1.398(6) | 1.368(4) | 1.377 | 1.371    | $\angle(2-1-8a)$  | 118.8(3) | 120.3(4) | 120.353 | 120.52   |
| r(1-8a)            | 1.403(9) | 1.45(1)  | 1.414 | 1.415    | $\angle(1-2-3)$   | 121.6(1) | 121.2(4) | 120.623 | 120.59   |
| r(2-3)             | 1.378(9) | 1.409(6) | 1.411 | 1.413    | $\angle(2-3-4)$   | 119.9(1) | 119.7(3) | 120.031 | 119.88   |
| r(3-4)             | 1.375(3) | 1.356(7) | 1.374 | 1.366    | $\angle(3-4-4a)$  | 120.7(1) | 121.8(5) | 121.034 | 121.36   |
| r(4-4a)            | 1.420(4) | 1.421(7) | 1.416 | 1.416    | $\angle(4-4a-8a)$ | 118.6(4) | 118.5(4) | 118.646 | 118.49   |
| r(4a-5)            | 1.426(3) | 1.414(7) | 1.414 | 1.413    | $\angle(5-4a-8a)$ | 119.9(4) | 118.8(4) | 119.230 | 119.14   |
| r(4a-8a)           | 1.404(4) | 1.422(4) | 1.429 | 1.426    | $\angle(1-8a-8)$  | 121.3(2) | 121.9(4) | 121.912 | 122.25   |
| r(5-6)             | 1.384(3) | 1.370(4) | 1.378 | 1.371    | $\angle(4a-5-6)$  | 120.2(2) | 120.9(6) | 120.670 | 120.91   |
| r(6-7)             | 1.378(4) | 1.411(5) | 1.411 | 1.410    | $\angle(5-6-7)$   | 120.2(1) | 119.9(3) | 120.19  | 119.98   |
| r(7-8)             | 1.378(2) | 1.366(5) | 1.379 | 1.371    | $\angle(6-7-8)$   | 120.7(1) | 120.3(3) | 120.366 | 120.53   |
| r(8-8a)            | 1.436(7) | 1.398(5) | 1.415 | 1.415    | $\angle(7-8-8a)$  | 120.5(3) | 120.4(4) | 120.775 | 120.85   |

**Table S17.** Substitution ( $r_s$ ), semi-experimental ( $r_{se}$ ), and theoretical structural parameters for *trans*-2-naphthol

| <b>Bond length</b> | $r_s$    | $r_{se}$ | MP2   | B3LYP-D3 | <b>Bond angle</b> | $r_s$    | $r_{se}$ | MP2     | B3LYP-D3 |
|--------------------|----------|----------|-------|----------|-------------------|----------|----------|---------|----------|
| r(1-2)             | 1.386(5) | 1.40(4)  | 1.376 | 1.371    | $\angle(2-1-8a)$  | 119.2(3) | 117(3)   | 120.269 | 119.267  |
| r(1-8a)            | 1.393(6) | 1.22(7)  | 1.412 | 1.415    | $\angle(1-2-3)$   | 120.0(2) | 121(2)   | 120.471 | 120.999  |
| r(2-3)             | 1.402(8) | 1.42(2)  | 1.411 | 1.413    | $\angle(2-3-4)$   | 119.9(1) | 120(2)   | 120.286 | 119.919  |
| r(3-4)             | 1.382(3) | 1.32(3)  | 1.377 | 1.366    | $\angle(3-4-4a)$  | 120.5(1) | 122(2)   | 120.817 | 120.574  |
| r(4-4a)            | 1.429(4) | 1.50(3)  | 1.414 | 1.416    | $\angle(4-4a-8a)$ | 118.4(4) | 112(7)   | 118.578 | 117.748  |
| r(4a-5)            | 1.414(3) | 1.49(3)  | 1.414 | 1.413    | $\angle(5-4a-8a)$ | 120.2(3) | 124(8)   | 119.323 | 121.297  |
| r(4a-8a)           | 1.411(3) | 1.48(4)  | 1.430 | 1.426    | $\angle(1-8a-8)$  | 121.3(2) | 119(3)   | 121.763 | 121.125  |
| r(5-6)             | 1.380(3) | 1.20(2)  | 1.378 | 1.371    | $\angle(4a-5-6)$  | 119.5(2) | 123(3)   | 120.611 | 119.930  |
| r(6-7)             | 1.411(4) | 1.50(1)  | 1.411 | 1.410    | $\angle(5-6-7)$   | 120.1(1) | 120(2)   | 120.204 | 120.128  |
| r(7-8)             | 1.386(2) | 1.37(2)  | 1.378 | 1.371    | $\angle(6-7-8)$   | 120.4(1) | 121(2)   | 120.406 | 120.504  |
| r(8-8a)            | 1.435(5) | 1.47(4)  | 1.416 | 1.415    | $\angle(7-8-8a)$  | 120.9(2) | 121(3)   | 120.796 | 120.757  |

## Data from AIMA11 QTAIM Calculations

**Table S18.** Compilation of results from QTAIM calculations with the AIMA11 program for *cis*- and *trans*-1-naphthol. All energies are in kcal/mol.

|                                     | <i>trans</i> -1-naphthol | <i>cis</i> -1-naphthol | $\Delta$ ( <i>trans</i> – <i>cis</i> ) |
|-------------------------------------|--------------------------|------------------------|----------------------------------------|
| <i>ab initio</i> energy             | -2.8948295089E+05        | -2.8948181925E+05      | -1.1316397750                          |
| C-skeleton <sup>a</sup>             | -2.3893145383E+05        | -2.3892238752E+05      | -9.0663095050                          |
| C-skeleton + O-atom                 | -2.8655709929E+05        | -2.8654901952E+05      | -8.0797621625                          |
| Ring H-atoms                        | -2.6895304201E+03        | -2.6952714802E+03      | 5.7410600680                           |
| All H-atoms                         | -2.9258579782E+03        | -2.9328113415E+03      | 6.9533632738                           |
| Total AIM energy                    | -2.8948295726E+05        | -2.8948183087E+05      | -1.1263938750                          |
| av H-atoms<br>(not OH, H-H contact) | -3.8498116888E+02        | -3.8338342209E+02      | -1.5977467875                          |
| (av H-atoms)<br>– (H-H contact)     | -5.3377620175            | 11.587525563           |                                        |
| H12 (C-H ... H)                     | -3.7964340686E+02        | -3.9497094765E+02      | 15.327540793                           |
| H19 (O-H ... H)                     | -2.3632755809E+02        | -2.3753986129E+02      | 1.2123032057                           |
| O18                                 | -4.7625645456E+04        | -4.7626632003E+04      | 0.98654734250                          |
| q(H12) <sup>b</sup> / e             | 0.056720892460           | -0.0046104091000       |                                        |
| q(H19) / e                          | 0.57607206328            | 0.57506762675          |                                        |
| C4-C11-O18 angle / °                | 116.469                  | 121.826                |                                        |
| H ... H distance / Å                | 2.27396                  | 1.87624                |                                        |
| Bond Path Length / Å                |                          | 2.098360697            |                                        |
| C4-C11-O18-H19 / °                  | -180                     | 6.462                  |                                        |

<sup>a</sup>The energies are the scaled electronic kinetic energies of the atoms (“K\_scaled” in AIMAll), an approximation to the virial-based total energies. <sup>b</sup>Net charge of the atom in units of the electron charge.

**Table S19.** Electron density derived properties related to the H12-H19 close contact in *cis*-1-naphthol at different levels of theory.

|                                                                       | <b>B3LYP</b> | <b>wB97XD</b> | <b>MP2</b> |
|-----------------------------------------------------------------------|--------------|---------------|------------|
| <b>BCP <math>\rho</math> [e/bohr<sup>3</sup>]<sup>a</sup></b>         | 0.01496      | 0.01534       | 0.01581    |
| <b>BCP <math>\Delta^2\rho</math> [e/bohr<sup>5</sup>]<sup>b</sup></b> | 0.05825      | 0.05530       | 0.05783    |
| <b>BCP H [hartree/bohr<sup>3</sup>]<sup>c</sup></b>                   | -0.002514    | -0.001843     | -0.001549  |
| <b>BCP <math>\varepsilon</math><sup>d</sup></b>                       | 1.0898       | 0.9651        | 1.0868     |
|                                                                       |              |               |            |
| <b>RCP <math>\rho</math> [e/bohr<sup>3</sup>]</b>                     | 0.01456      | 0.01581       | 0.01539    |
| <b>RCP <math>\Delta^2\rho</math> [e/bohr<sup>5</sup>]</b>             | 0.06948      | 0.07003       | 0.07061    |
|                                                                       |              |               |            |
| <b>q(H12) [e]<sup>e</sup></b>                                         | -0.004610    | -0.014655     | 0.006553   |
| <b>q(H19) [e]</b>                                                     | 0.5751       | 0.5996        | 0.6135     |
|                                                                       |              |               |            |
| <b>IBSI<sup>f</sup></b>                                               | 0.031        | 0.036         | 0.045      |

<sup>a</sup> Electron density; <sup>b</sup> Laplacian of electron density; <sup>c</sup> Total energy density; <sup>d</sup> Bond ellipticity  $\varepsilon=(\lambda_1/\lambda_2)-1$ ; <sup>e</sup> Net charge of atom; Intrinsic Bond Strength Index.

## Semi-Experimental Rotational Constants for $^{12}\text{C}$ and $^{13}\text{C}$ Isotopologues

**Table S20.** Experimental, semi-experimental, and ab initio rotational constants and inertial defects for all four conformers of naphthol

| <i>cis</i> -1-naphthol          | Experiment | Semi-Experiment | B3LYP-D3  |
|---------------------------------|------------|-----------------|-----------|
| A / MHz                         | 1947.51310 | 1962.355        | 1959.859  |
| B / MHz                         | 1124.30739 | 1130.679        | 1130.8340 |
| C / MHz                         | 713.09734  | 717.334         | 717.128   |
| $\Delta_I$ / amu $\text{\AA}^2$ | -0.2925    | 0.0175          | -0.0468   |
| <i>trans</i> -1-naphthol        |            |                 |           |
| A / MHz                         | 1942.10150 | 1955.784        | 1955.174  |
| B / MHz                         | 1133.62357 | 1141.283        | 1139.056  |
| C / MHz                         | 716.01804  | 720.758         | 719.744   |
| $\Delta_I$ / amu $\text{\AA}^2$ | -0.2124    | -0.0417         | -0.0003   |
| <i>cis</i> -2-naphthol          |            |                 |           |
| A / MHz                         | 2849.15630 | 2870.909        | 2870.704  |
| B / MHz                         | 824.63286  | 829.670         | 828.986   |
| C / MHz                         | 639.7240   | 643.692         | 643.236   |
| $\Delta_I$ / amu $\text{\AA}^2$ | -0.2364    | -0.0415         | -0.0001   |
| <i>trans</i> -2-naphthol        |            |                 |           |
| A / MHz                         | 2845.35700 | 2867.769        | 2868.659  |
| B / MHz                         | 825.53621  | 830.467         | 829.642   |
| C / MHz                         | 640.08728  | 644.012         | 643.528   |
| $\Delta_I$ / amu $\text{\AA}^2$ | -0.2510    | -0.0398         | -0.0000   |



**Table S21.** Semi-experimental rotational constants and inertial defects for  $^{13}\text{C}$  isotopologues of *cis*-1-naphthol

|                                     | $^{13}\text{C-1}$ | $^{13}\text{C-2}$ | $^{13}\text{C-3}$ | $^{13}\text{C-4}$ | $^{13}\text{C-4a}$ |
|-------------------------------------|-------------------|-------------------|-------------------|-------------------|--------------------|
| A / MHz                             | 1959.089          | 1961.892          | 1943.403          | 1934.332          | 1955.801           |
| B                                   | 1126.065          | 1117.505          | 1121.539          | 1129.851          | 1130.283           |
| C                                   | 714.889           | 711.951           | 711.116           | 713.200           | 716.304            |
| $\Delta / \text{amu } \text{\AA}^2$ | 0.167             | 0.014             | 0.024             | 0.042             | 0.010              |
|                                     | $^{13}\text{C-5}$ | $^{13}\text{C-6}$ | $^{13}\text{C-7}$ | $^{13}\text{C-8}$ | $^{13}\text{C-8a}$ |
| A / MHz                             | 1950.796          | 1961.861          | 1953.752          | 1947.158          | 1960.954           |
| B                                   | 1122.630          | 1112.070          | 1116.794          | 128.003           | 1130.725           |
| C                                   | 712.549           | 709.734           | 710.587           | 714.230           | 717.172            |
| $\Delta / \text{amu } \text{\AA}^2$ | 0.018             | 0.017             | 0.016             | 0.009             | 0.011              |

**Table S22.** Semi-experimental rotational constants and inertial defects for  $^{13}\text{C}$  isotopologues of *trans*-1-naphthol

|                                     | $^{13}\text{C-1}$ | $^{13}\text{C-2}$ | $^{13}\text{C-3}$ | $^{13}\text{C-4}$ | $^{13}\text{C-4a}$ |
|-------------------------------------|-------------------|-------------------|-------------------|-------------------|--------------------|
| A / MHz                             | 1951.794          | 1955.391          | 1937.120          | 1927.810          | 1949.200           |
| B                                   | 1120.205          | 1127.864          | 1131.860          | 1140.390          | 1140.890           |
| C                                   | 710.5892          | 715.392           | 714.464           | 716.567           | 719.707            |
| $\Delta / \text{amu } \text{\AA}^2$ | -0.042            | -0.041            | -0.038            | -0.038            | -0.042             |
|                                     | $^{13}\text{C-5}$ | $^{13}\text{C-6}$ | $^{13}\text{C-7}$ | $^{13}\text{C-8}$ | $^{13}\text{C-8a}$ |
| A / MHz                             | 1944.105          | 1955.260          | 1947.340          | 1940.750          | 1954.500           |
| B                                   | 1133.165          | 1122.500          | 1127.270          | 1138.600          | 1141.330           |
| C                                   | 715.932           | 713.148           | 714.007           | 717.642           | 720.601            |
| $\Delta / \text{amu } \text{\AA}^2$ | -0.040            | -0.039            | -0.039            | -0.040            | -0.042             |

**Table S23.** Semi-experimental rotational constants and inertial defects for  $^{13}\text{C}$  isotopologues of *cis*-2-naphthol

|                               | $^{13}\text{C-1}$ | $^{13}\text{C-2}$ | $^{13}\text{C-3}$ | $^{13}\text{C-4}$ | $^{13}\text{C-4a}$ |
|-------------------------------|-------------------|-------------------|-------------------|-------------------|--------------------|
| A / MHz                       | 2851.955          | 2870.419          | 2848.858          | 2827.320          | 2861.391           |
| B                             | 828.271           | 823.919           | 825.086           | 829.250           | 829.287            |
| C                             | 641.884           | 640.196           | 639.816           | 641.211           | 642.974            |
| $\Delta$ / amu $\text{\AA}^2$ | -0.029            | -0.036            | -0.032            | -0.025            | -0.032             |
|                               | $^{13}\text{C-5}$ | $^{13}\text{C-6}$ | $^{13}\text{C-7}$ | $^{13}\text{C-8}$ | $^{13}\text{C-8a}$ |
| A / MHz                       | 2846.196          | 2868.854          | 2854.860          | 2835.411          | 2864.995           |
| B                             | 824.931           | 818.221           | 819.967           | 826.989           | 829.566            |
| C                             | 639.587           | 636.672           | 637.034           | 640.273           | 643.324            |
| $\Delta$ / amu $\text{\AA}^2$ | -0.030            | -0.035            | -0.033            | -0.028            | -0.032             |

**Table S24.** Semi-experimental rotational constants and inertial defects for  $^{13}\text{C}$  isotopologues of *trans*-2-naphthol

|                               | $^{13}\text{C-1}$ | $^{13}\text{C-2}$ | $^{13}\text{C-3}$ | $^{13}\text{C-4}$ | $^{13}\text{C-4a}$ |
|-------------------------------|-------------------|-------------------|-------------------|-------------------|--------------------|
| A / MHz                       | 2848.8383         | 2867.1962         | 2845.486          | 2823.8622         | 2858.0765          |
| B                             | 829.05174         | 824.69864         | 825.8906          | 830.05354         | 830.03094          |
| C                             | 642.20149         | 640.50859         | 640.1348          | 641.51819         | 643.28059          |
| $\Delta$ / amu $\text{\AA}^2$ | -0.037            | -0.040            | -0.034            | -0.032            | -0.065             |
|                               | $^{13}\text{C-5}$ | $^{13}\text{C-6}$ | $^{13}\text{C-7}$ | $^{13}\text{C-8}$ | $^{13}\text{C-8a}$ |
| A / MHz                       | 2846.8546         | 2865.6346         | 2851.488          | 2832.166          | 2861.7942          |
| B                             | 824.82613         | 818.99393         | 820.77454         | 827.8339          | 830.36124          |
| C                             | 639.54452         | 636.98871         | 637.35539         | 640.6052          | 643.64539          |
| $\Delta$ / amu $\text{\AA}^2$ | -0.014            | -0.043            | -0.036            | -0.017            | -0.038             |

## Non-Covalent Interaction (NCI) Plots

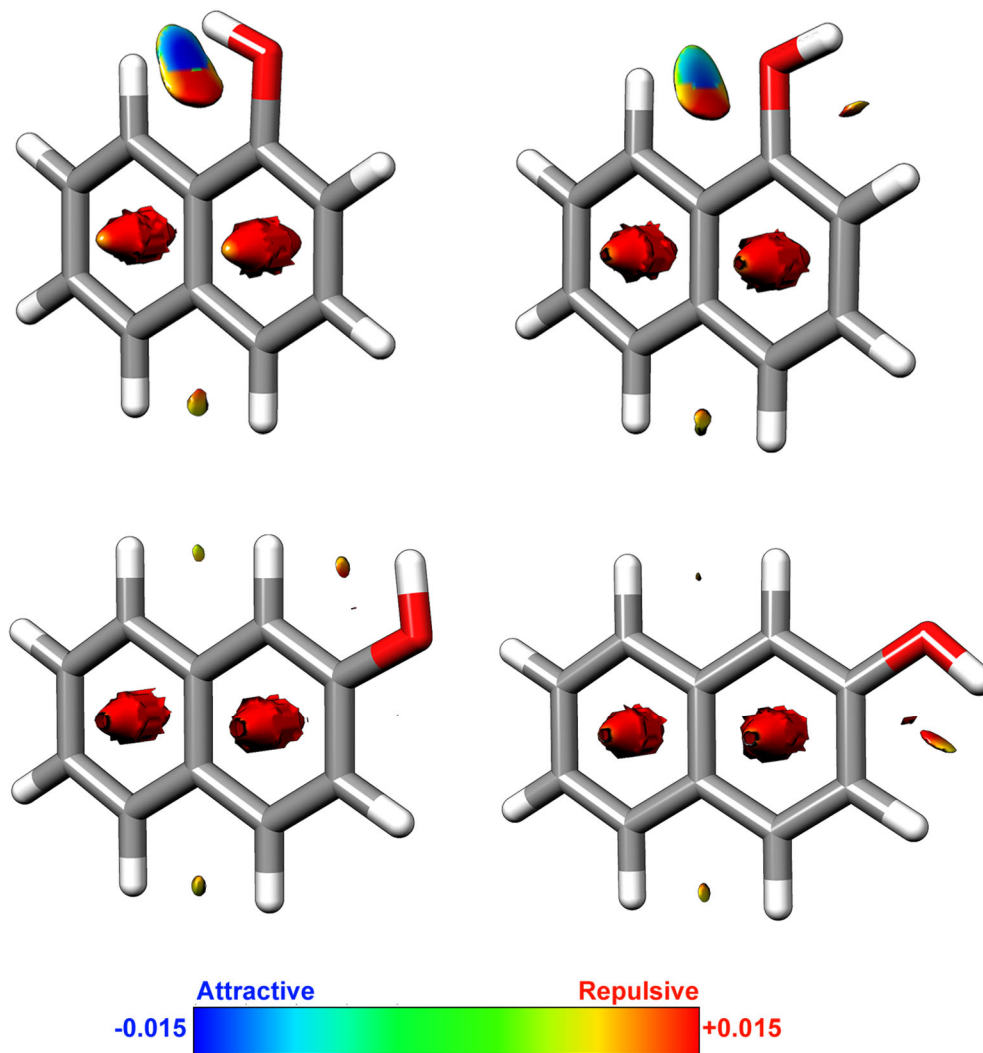

**Figure S3.** Results from non-covalent interactions (NCI) analyses of the four experimentally assigned naphthol conformers ( $s=0.75$ ). The 3D isosurfaces presented contain attractive (blue) and repulsive (red) regions. See, however, the text for the close-contact H-atoms in *cis*-1-naphthol.

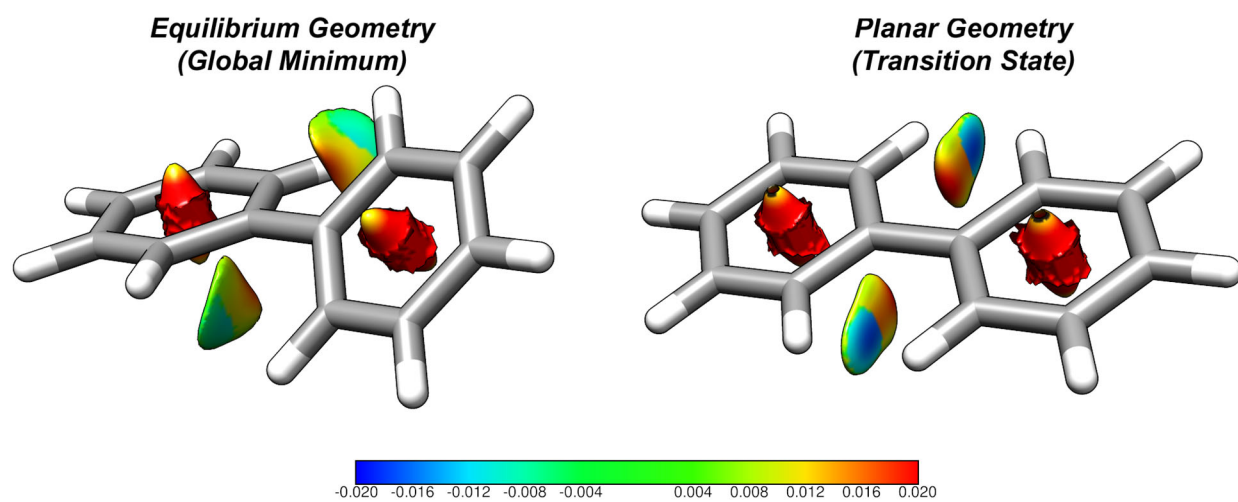

**Figure S4.** Results from non-covalent interactions (NCI) analyses of biphenyl. The 3D isosurfaces presented contain attractive (blue) and repulsive (red) regions.

## Local Mode Analyses

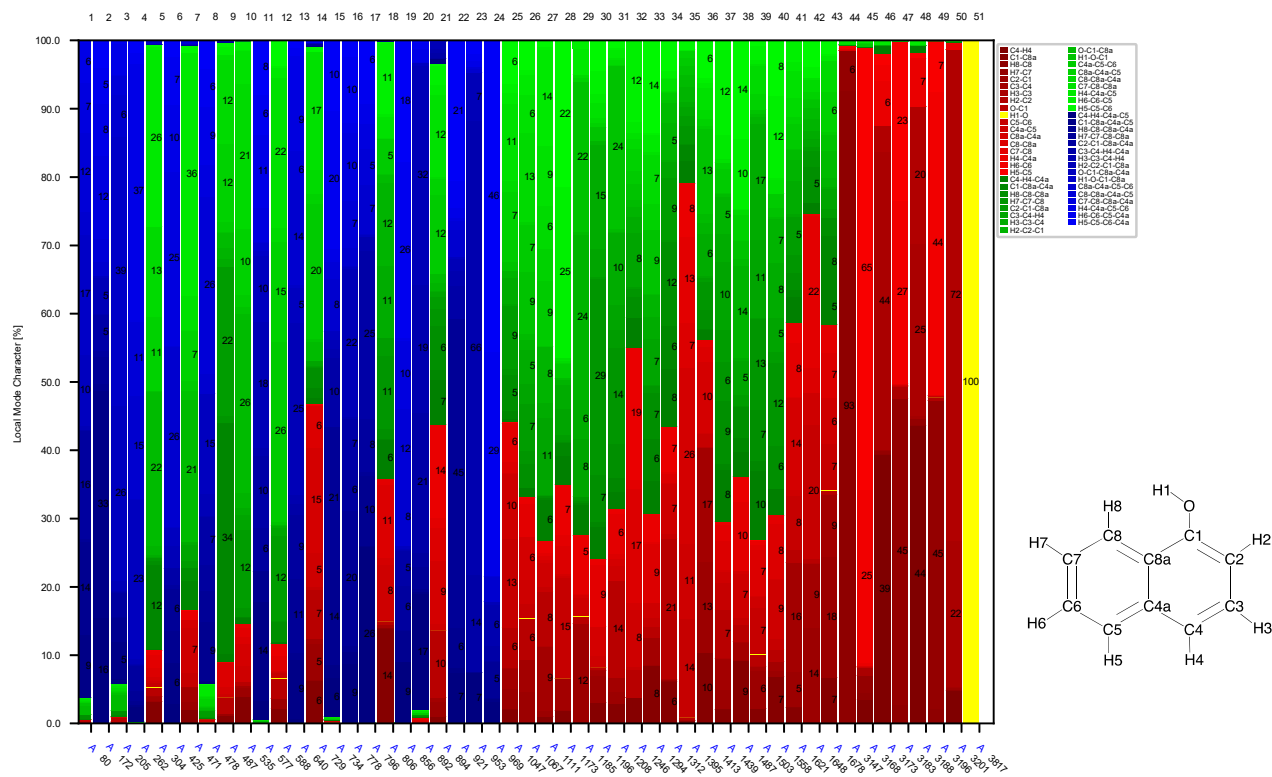

**Figure S5.** Decomposition of normal vibrational modes into %LVM contributions for *cis*-1-naphthol (B3LYP-D3(BJ)). % Contribution from O-H local stretching mode to O-H normal mode (3817 cm<sup>-1</sup>) is shown in yellow. Numbering of local modes are as in the scheme.

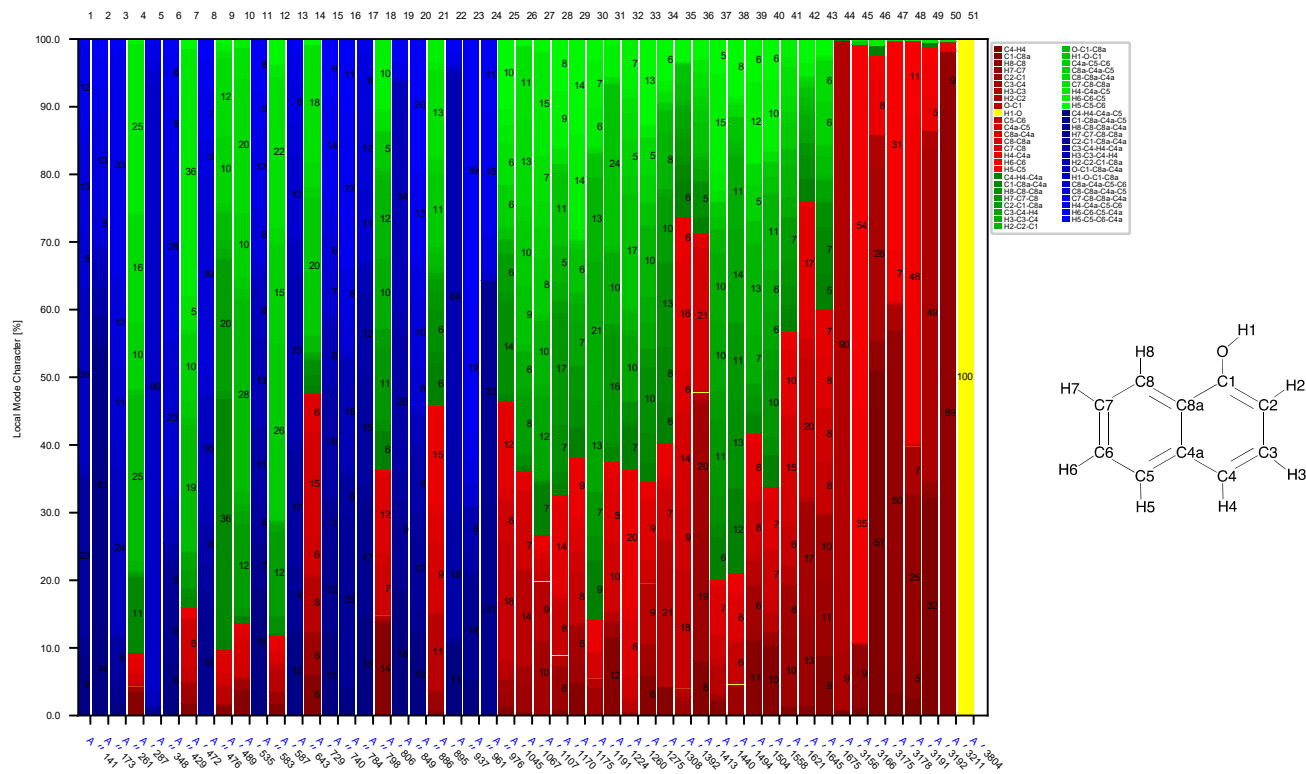

**Figure S6.** Decomposition of normal vibrational modes into %LVM contributions for *trans*-1-naphthol (B3LYP-D3(BJ)). % Contribution from O-H local stretching mode to O-H normal mode (3804  $\text{cm}^{-1}$ ) is shown in yellow. Numbering of local modes are as in the scheme.

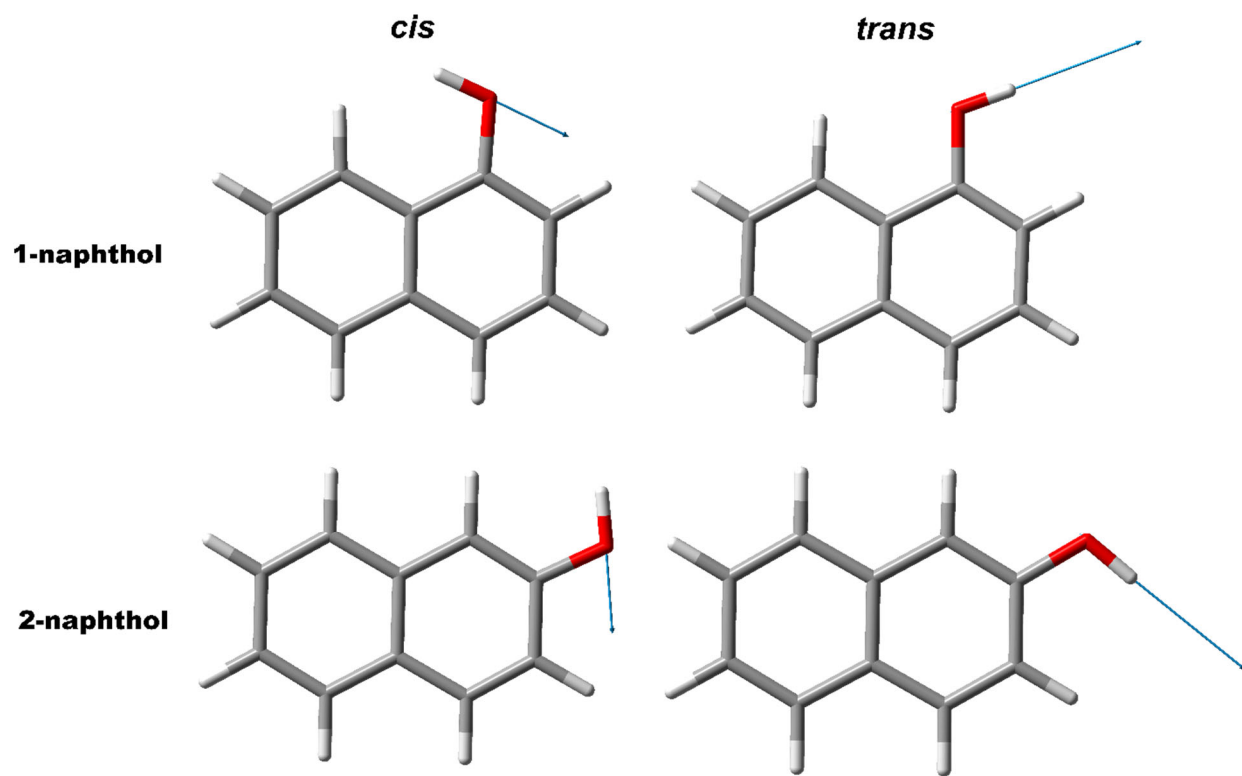

**Figure S7.** Vibrational displacement vectors for the O-H stretching vibration

**Table S25.** <sup>b</sup> For each local mode, the local mode force constant  $k^a$  (mDyn/Å for stretching and mDyn.Å/Rad<sup>2</sup> for bending vibrations) and local mode frequency  $\omega^a$  (cm<sup>-1</sup>) are given. Reported values are for MP2/aug-cc-pVTZ calculations followed by values for B3LYP-D3(BJ)/def2-TZVP calculations in parentheses.

| Parameter <sup>b</sup> | <i>cis</i> -1-naphthol |                 | <i>trans</i> -1-naphthol |                 |                 |                 |
|------------------------|------------------------|-----------------|--------------------------|-----------------|-----------------|-----------------|
|                        | $k^a$                  | $\omega^a$      | $k^a$                    | $\omega^a$      |                 |                 |
| <b>O1-H1</b>           | 8.169 (8.085)          | 3824.2 (3804.5) | 8.097 (8.057)            | 3807.2 (3797.8) |                 |                 |
| <b>C1-O1</b>           | 5.825 (5.609)          | 1200.8 (1178.3) | 5.790 (5.673)            | 1197.3 (1185.0) |                 |                 |
| <b>H1-O1-C1</b>        | 0.743 (0.735)          | 1254.1 (1248.9) | 0.745 (0.749)            | 1253.1 (1258.6) |                 |                 |
| <b>O1-C1-C2</b>        | 1.716 (1.694)          | 774.6 (772.9)   | 1.756 (1.804)            | 798.1 (810.7)   |                 |                 |
| <b>O1-C1-C3</b>        | 1.771 (1.728)          | 787.2 (777.0)   | 1.727 (1.777)            | 762.8 (774.6)   |                 |                 |
|                        | <i>cis</i> -2-naphthol |                 | <i>trans</i> -2-naphthol |                 |                 |                 |
|                        | $k^a$                  | $\omega^a$      | $k^a$                    | $\omega^a$      |                 |                 |
| <b>O1-H1</b>           | 8.091 (8.035)          | 3805.8 (3792.6) | 8.143 (8.070)            | 3818.0 (3800.9) |                 |                 |
| <b>C1-O1</b>           | 5.851 (5.735)          | 1203.6 (1191.5) | 5.824 (5.709)            | 1200.7(1188.8)  |                 |                 |
| <b>H1-O1-C1</b>        | 0.749 (0.754)          | 1256.4 (1262.6) | 0.754 (0.759)            | 1261.4 (1267.0) |                 |                 |
| <b>O1-C1-C2</b>        | 1.599 (1.647)          | 763.1(776.3)    | 1.540 (1.593)            | 735.9 (751.6)   |                 |                 |
| <b>O1-C1-C3</b>        | 1.548 (1.600)          | 723.3 (736.4)   | 1.597 (1.646)            | 748.1 (759.2)   |                 |                 |
|                        | References             |                 |                          |                 |                 |                 |
|                        | water                  |                 | methanol                 |                 | 2-propanol      |                 |
|                        | $k^a$                  | $\omega^a$      | $k^a$                    | $\omega^a$      | $k^a$           | $\omega^a$      |
| <b>O1-H1</b>           | 8.348 (8.151)          | 3865.9 (3819.9) | 8.288 (8.091)            | 3851.9 (3805.9) | 8.158 (8.045)   | 3821.5 (3795.0) |
| <b>C1-O1</b>           | -                      | -               | 4.775 (4.628)            | 1087.3 (1070.4) | 4.417 (4.220)   | 1045.6 (1022.1) |
| <b>H1-O1-C1</b>        | -                      | -               | 0.731 (0.736)            | 1241.6 (1245.2) | 0.718 (0.723)   | 1227.0 (1232.1) |
| <b>O1-C1-C2</b>        | -                      | -               | -                        | -               | 1.280 (1.301)   | 609.3 (613.6)   |
| <b>O1-C1-C3</b>        | -                      | -               | -                        | -               | 1.323 (1.340)   | 608.8 (613.0)   |
|                        | propen-2-ol            |                 | phenol                   |                 |                 |                 |
|                        | $k^a$                  | $\omega^a$      | $k^a$                    | $\omega^a$      | $k^a$           | $\omega^a$      |
| <b>O1-H1</b>           | 8.221 (8.120)          | 3836.4 (3812.7) | 8.132 (8.054)            |                 | 3815.5 (3797.1) |                 |
| <b>C1-O1</b>           | 5.572 (5.426)          | 1174.5 (1159.0) | 5.838 (5.729)            |                 | 1202.2 (1190.9) |                 |
| <b>H1-O1-C1</b>        | 0.762 (0.768)          | 1269.9 (1275.3) | 0.751 (0.755)            |                 | 1258.4 (1264.0) |                 |
| <b>O1-C1-C2</b>        | 1.408 (1.461)          | 668.6 (680.3)   | 1.599 (1.642)            |                 | 756.0 (767.0)   |                 |
| <b>O1-C1-C3</b>        | 1.375 (1.428)          | 708.4 (724.7)   | 1.543 (1.590)            |                 | 729.8 (743.0)   |                 |



## Inertial Defect Differences

**Table S26.** Inertial defects and defect differences between calculated and experimental defect values for all four naphthol conformers. <sup>a</sup>The experimental inertial defect values. <sup>b</sup>The calculated inertial defect values obtained from summing Oka's equation over the lowest out-of-plane vibrational modes. <sup>c</sup>Moment of inertia values from the fit of Jahn et al..

|                          | <sup>a</sup> $\Delta_e /$<br>amu Å <sup>2</sup> | <sup>b</sup> $\Delta_{l=2}/$<br>amu Å <sup>2</sup> | $\Delta_e - \Delta_{l=2} /$<br>amu Å <sup>2</sup> | <sup>c</sup> $(I_{cc})^{1/2} /$<br>amu <sup>0.5</sup> Å | $(I_{cc})^{1/2} /$<br>amu <sup>0.5</sup> Å |
|--------------------------|-------------------------------------------------|----------------------------------------------------|---------------------------------------------------|---------------------------------------------------------|--------------------------------------------|
| <i>cis</i> -1-naphthol   | -0.2925                                         | -0.62                                              | 0.33                                              | 30.8                                                    | 26.6                                       |
| <i>trans</i> -1-naphthol | -0.2124                                         | -0.43                                              | 0.22                                              | 20.6                                                    | 26.6                                       |
| <i>cis</i> -2-naphthol   | -0.2365                                         | -0.46                                              | 0.23                                              | 21.5                                                    | 28.1                                       |
| <i>trans</i> -2-naphthol | -0.251                                          | -0.46                                              | 0.21                                              | 19.6                                                    | 28.1                                       |

**Table S27.** The calculated inertial defect values obtained from summing Oka's equation over the lowest out-of-plane vibrational modes.

|                         | <sup>a</sup> $\Delta_{l=1}/$ amu Å <sup>2</sup> | <sup>b</sup> $\Delta_{l=2}/$ amu Å <sup>2</sup> | <sup>c</sup> $\Delta_{l=3}/$ amu Å <sup>2</sup> | <sup>d</sup> $\Delta_{l=4}/$ amu Å <sup>2</sup> | <sup>e</sup> $\Delta_{l=5}/$ amu Å <sup>2</sup> |
|-------------------------|-------------------------------------------------|-------------------------------------------------|-------------------------------------------------|-------------------------------------------------|-------------------------------------------------|
| <i>cis</i> 1-naphthol   | -0.42                                           | -0.62                                           | -0.78                                           | -0.91                                           | -0.99                                           |
| <i>trans</i> 1-naphthol | -0.24                                           | -0.43                                           | -0.56                                           | -0.68                                           | -0.78                                           |
| <i>cis</i> 2-naphthol   | -0.28                                           | -0.46                                           | -0.57                                           | -0.67                                           | -0.74                                           |
| <i>trans</i> 2-naphthol | -0.28                                           | -0.46                                           | -0.57                                           | -0.68                                           | -0.76                                           |

<sup>a</sup>Summed over the lowest out-of-plane modes, <sup>b</sup>two lowest out-of-plane modes, <sup>c</sup>three lowest out-of-plane modes, <sup>d</sup>four lowest out-of-plane modes, <sup>e</sup>five lowest out-of-plane modes.

**Table S28.** Inertial defect differences between the experiment and calculated inertial defect values summed over Oka's equation.

|                         | $\Delta_e - \Delta_{l=1} /$<br>amu Å <sup>2</sup> | $\Delta_e - \Delta_{l=2} /$<br>amu Å <sup>2</sup> | $\Delta_e - \Delta_{l=3} /$<br>amu Å <sup>2</sup> | $\Delta_e - \Delta_{l=4} /$<br>amu Å <sup>2</sup> | $\Delta_e - \Delta_{l=5} /$<br>amu Å <sup>2</sup> |
|-------------------------|---------------------------------------------------|---------------------------------------------------|---------------------------------------------------|---------------------------------------------------|---------------------------------------------------|
| <i>cis</i> 1-naphthol   | 0.13                                              | 0.33                                              | 0.49                                              | 0.62                                              | 0.70                                              |
| <i>trans</i> 1-naphthol | 0.03                                              | 0.22                                              | 0.35                                              | 0.47                                              | 0.57                                              |
| <i>cis</i> 2-naphthol   | 0.04                                              | 0.23                                              | 0.34                                              | 0.43                                              | 0.51                                              |
| <i>trans</i> 2-naphthol | 0.03                                              | 0.21                                              | 0.32                                              | 0.43                                              | 0.52                                              |

**Table S29.** Lowest out-of-plane modes and the theoretical and experimental inertial defects from previous work and for the four isomers of naphthol.

|                                 | $\Delta_{\text{exp}} /$<br>$\text{amu \AA}^2$ | Lowest out-of-plane<br>(l=1) / $\text{cm}^{-1}$ | (l=2)            | (l=3)            | (l=4)            | (l=5) | $(I_{cc})^{1/2}$ | Rings |
|---------------------------------|-----------------------------------------------|-------------------------------------------------|------------------|------------------|------------------|-------|------------------|-------|
| Quinoline <sup>a</sup>          | -0.13405                                      | 173 <sup>g</sup>                                | 182 <sup>g</sup> | -                | -                | -     | 23.6             | 2     |
| Isoquinoline <sup>a</sup>       | -0.13485                                      | 171 <sup>g</sup>                                | 185 <sup>g</sup> | -                | -                | -     | 23.8             | 2     |
| Phthalazine <sup>b</sup>        | -0.154                                        | 170 <sup>g</sup>                                | 177 <sup>g</sup> | -                | -                | -     | 23.7             | 2     |
| Quinazoline <sup>b</sup>        | -0.136                                        | 172 <sup>g</sup>                                | 180 <sup>g</sup> | -                | -                | -     | 23.5             | 2     |
| Quinoxaline <sup>b</sup>        | -0.119                                        | 173 <sup>g</sup>                                | 184 <sup>g</sup> | -                | -                | -     | 23.3             | 2     |
| Acridine <sup>c</sup>           | -0.4363                                       | 93 <sup>g</sup>                                 | 114 <sup>g</sup> | 238 <sup>g</sup> | -                | -     | 36.3             | 3     |
| Phenanthroline <sup>c</sup>     | -0.4423                                       | 98 <sup>g</sup>                                 | 104 <sup>g</sup> | 238 <sup>g</sup> | -                | -     | 34.4             | 3     |
| Phenanthridine <sup>c</sup>     | -0.4576                                       | 99 <sup>g</sup>                                 | 104 <sup>g</sup> | 233 <sup>g</sup> | -                | -     | 34.9             | 3     |
| 5,6-Benzoquinoline <sup>d</sup> | -0.471                                        | 93 <sup>g</sup>                                 | 100 <sup>g</sup> | 222 <sup>g</sup> | -                | -     | 34.9             | 3     |
| 7,8-Benzoquinoline <sup>d</sup> | -0.413                                        | 98 <sup>g</sup>                                 | 115 <sup>g</sup> | 228 <sup>g</sup> | -                | -     | 34.6             | 3     |
| Benzanthrone <sup>e</sup>       | -1.054                                        | 45 <sup>g</sup>                                 | 94 <sup>g</sup>  | 135 <sup>g</sup> | 165 <sup>g</sup> | -     | 43.9             | 4     |
| Naphthalene <sup>f</sup>        | -0.137                                        | 172                                             | 186              | 395              | 480              | 487   | 23.9             | 2     |
| <i>cis</i> -1-naphthol          | -0.2925                                       | 80                                              | 172              | 205              | 262              | 425   | 26.6             | 2     |
| <i>trans</i> -1-naphthol        | -0.2124                                       | 141                                             | 173              | 261              | 287              | 348   | 26.6             | 2     |
| <i>cis</i> -2-naphthol          | -0.2365                                       | 122                                             | 182              | 300              | 366              | 411   | 28.1             | 2     |
| <i>trans</i> -2-naphthol        | -0.251                                        | 122                                             | 181              | 299              | 307              | 411   | 28.1             | 2     |

## Lowest Out-of-Plane Vibrational Modes (cis 1-naphthol)

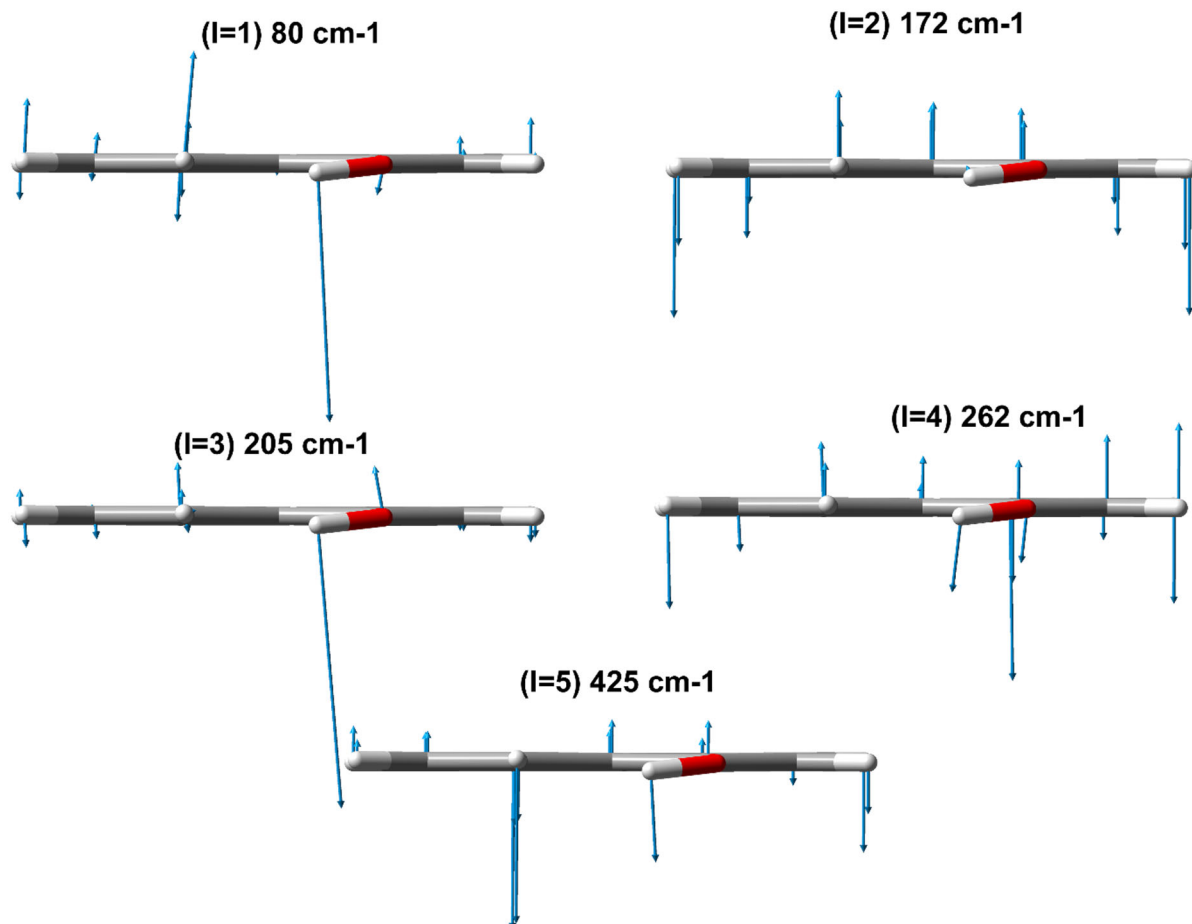

**Figure S8.** Lowest out-of-plane vibrational modes, with their respective displacement vectors, for *cis*-1-naphthol calculated at the B3LYP-D3(BJ)/def2-TZVP level of theory.

## Lowest Out-of-Plane Vibrational Modes (trans 1-naphthol)

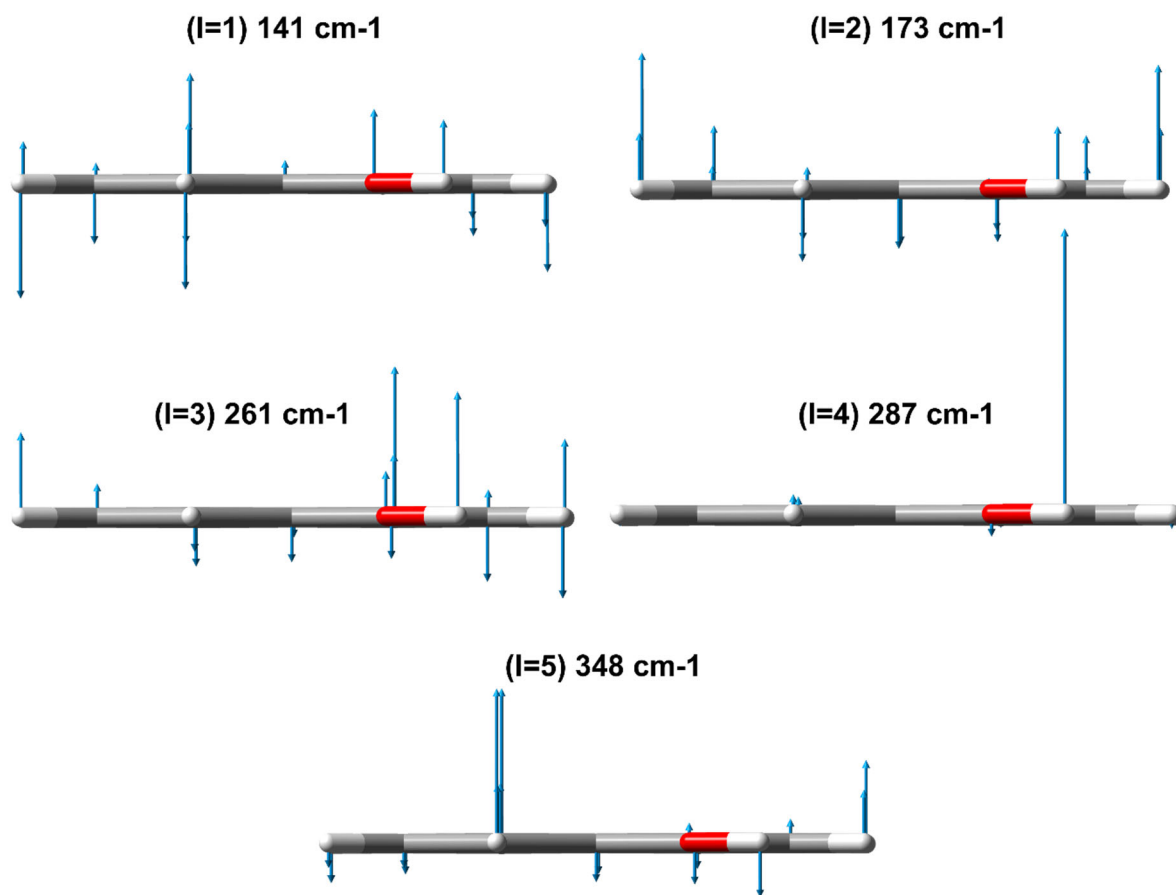

**Figures S9.** Lowest out-of-plane vibrational modes, with their respective displacement vectors, for *trans*-1-naphthol calculated at the B3LYP-D3(BJ)/def2-TZVP level of theory.

## Lowest Out-of-Plane Vibrational Modes (cis 2-naphthol)

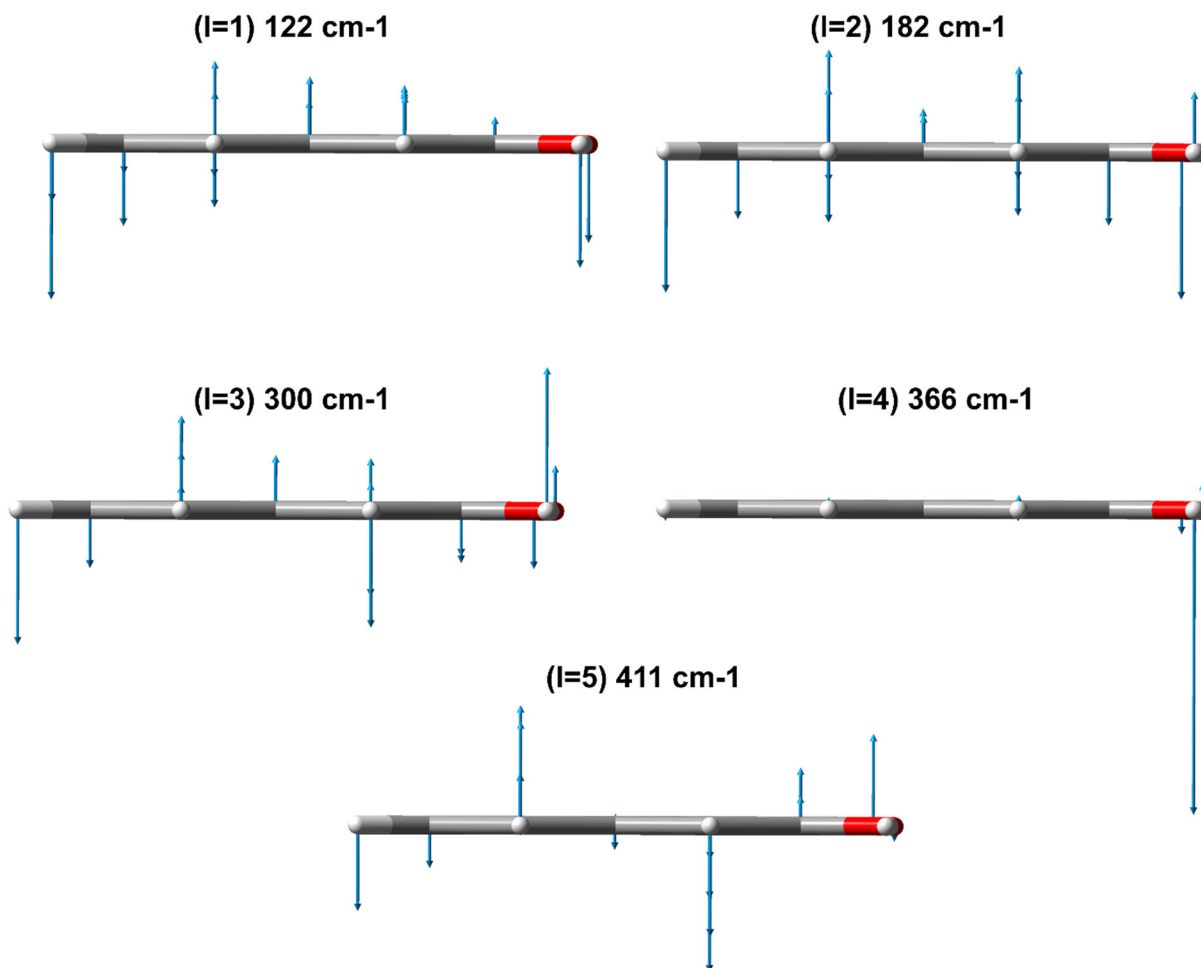

**Figures S10.** Lowest out-of-plane vibrational modes, with their respective displacement vectors, for *cis*-2-naphthol calculated at the B3LYP-D3(BJ)/def2-TZVP level of theory.

## Lowest Out-of-Plane Vibrational Modes (trans 2-naphthol)

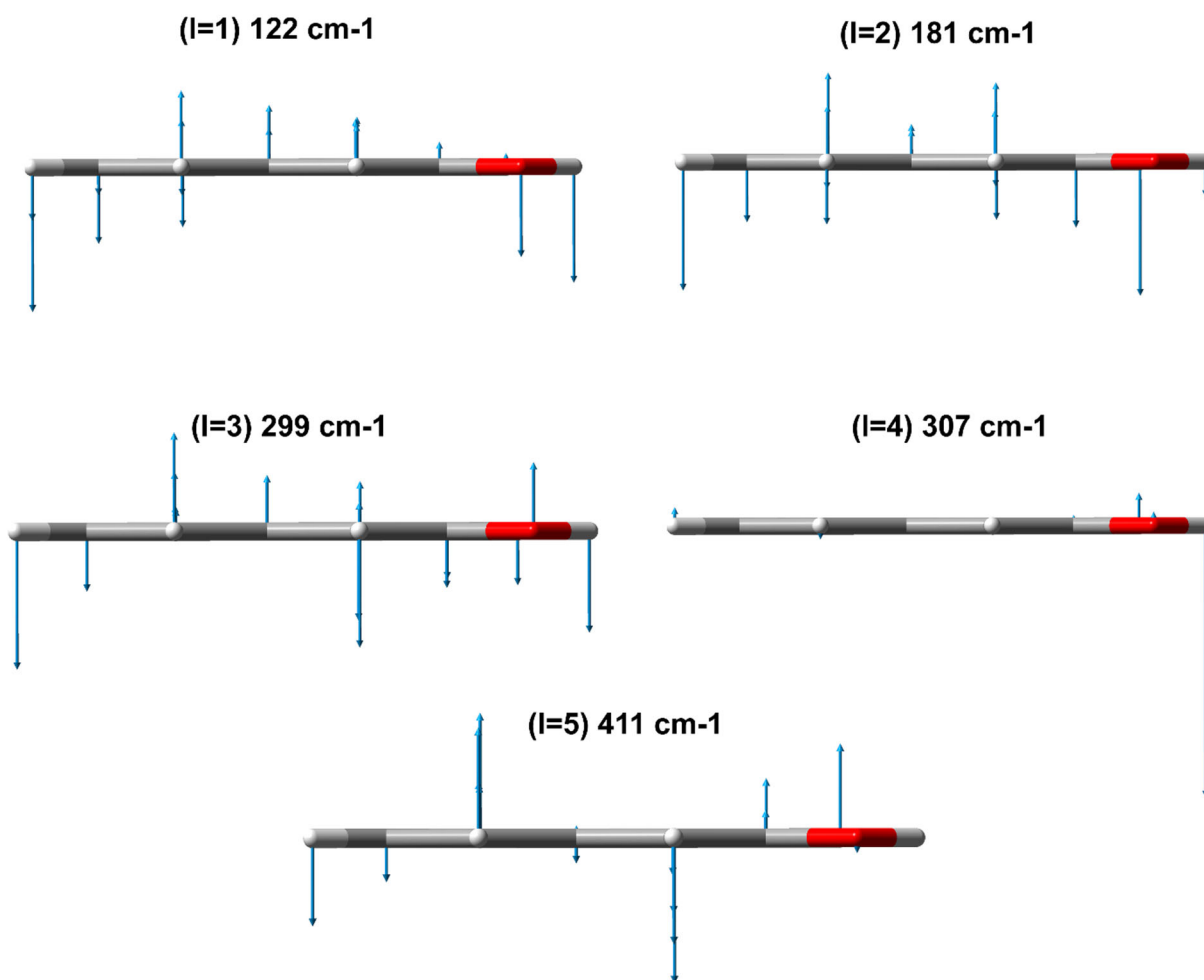

**Figures S11.** Lowest out-of-plane vibrational modes, with their respective displacement vectors, for *trans*-2-naphthol calculated at the B3LYP-D3(BJ)/def2-TZVP level of theory.

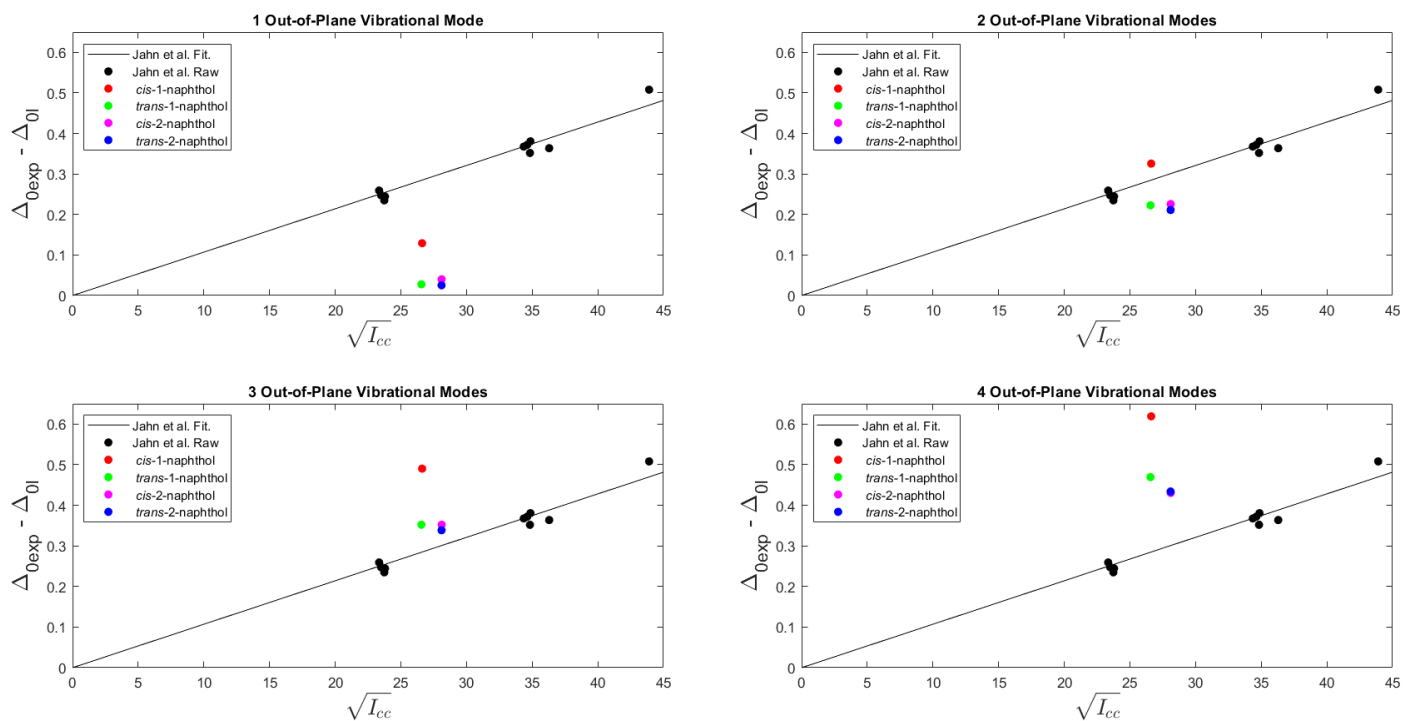

**Figure S12.** Inertial defect differences for the four isomers of naphthol compared to the results of Jahn et al. The four plots contain different numbers of out-of-plane vibrations used to sum over Oka's equation.

## Charge Model 5 Analysis

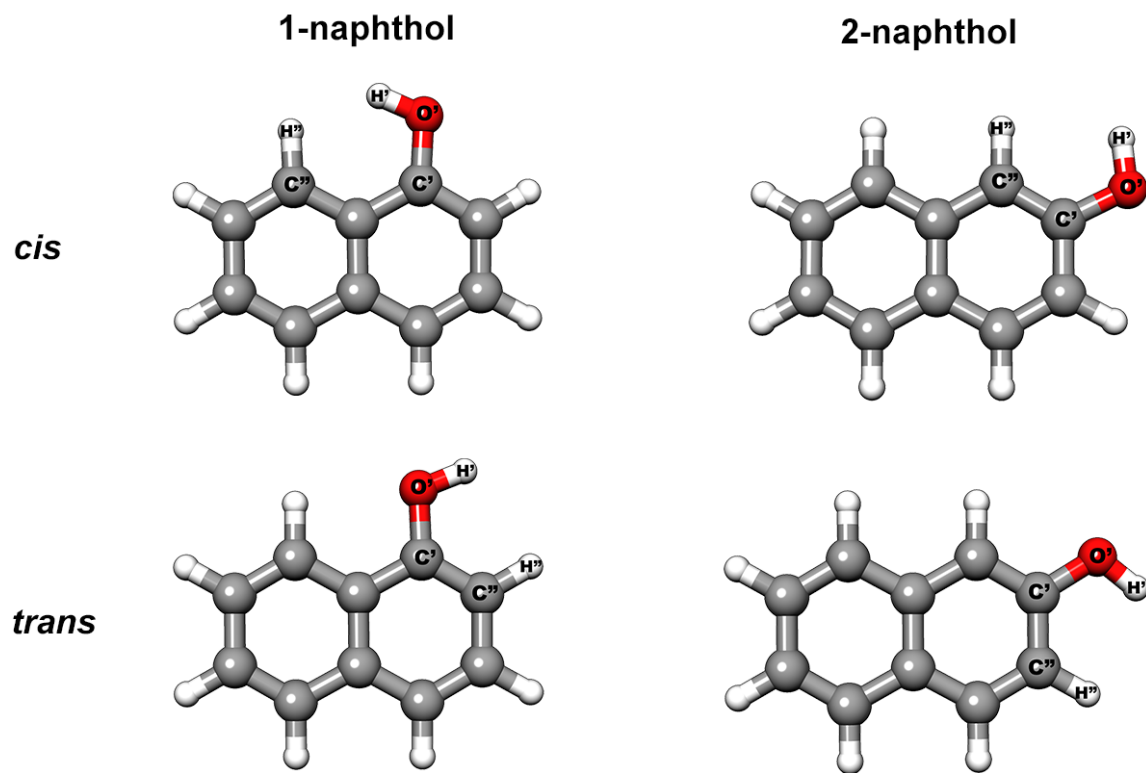

Figure S13. Atom labelling used in the descriptions of the H-H interactions



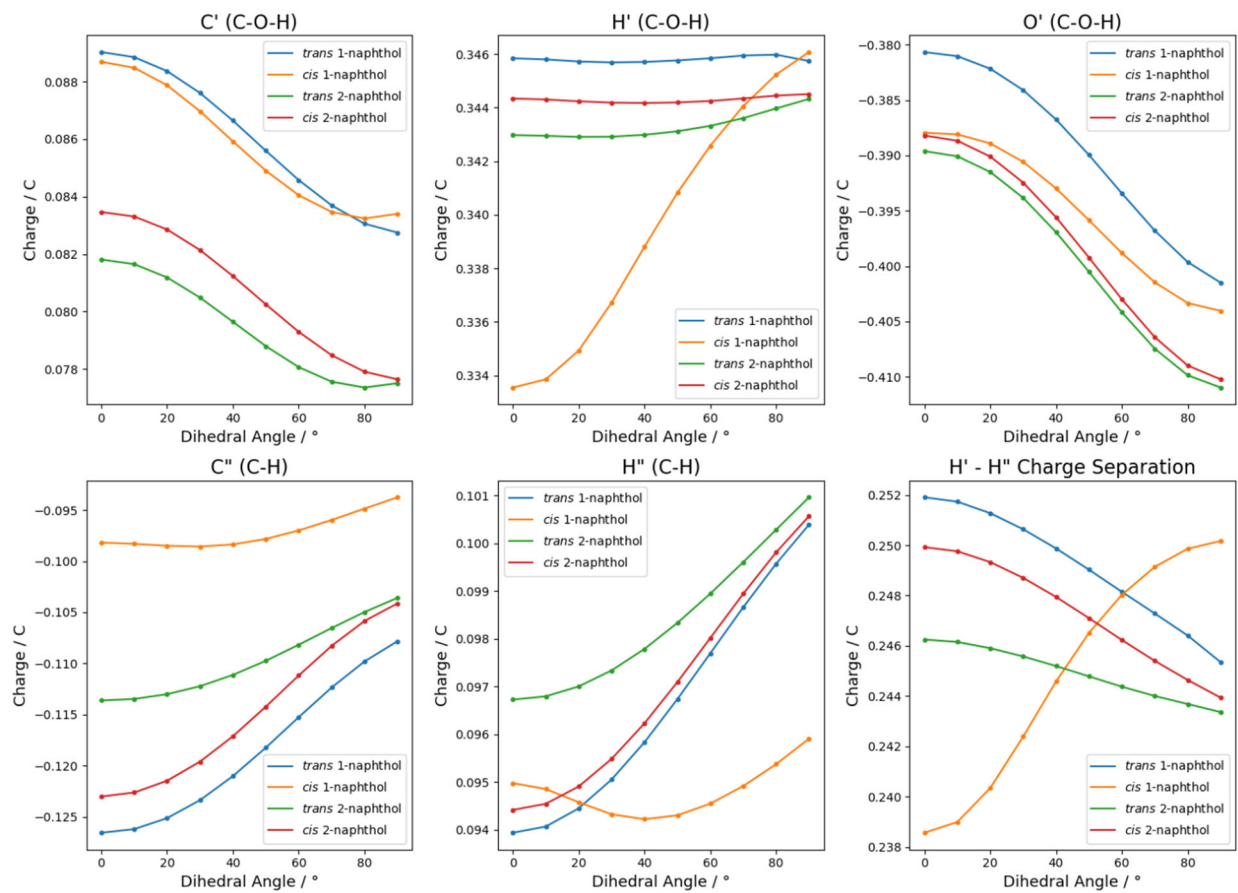

**Figure S14.** Charge Model 5 (CM5) charges for atoms involved in the H-H interaction for all four naphthol isomers. The H'-H'' charge separation was calculated by subtracting the H'' charge from the H' charge.

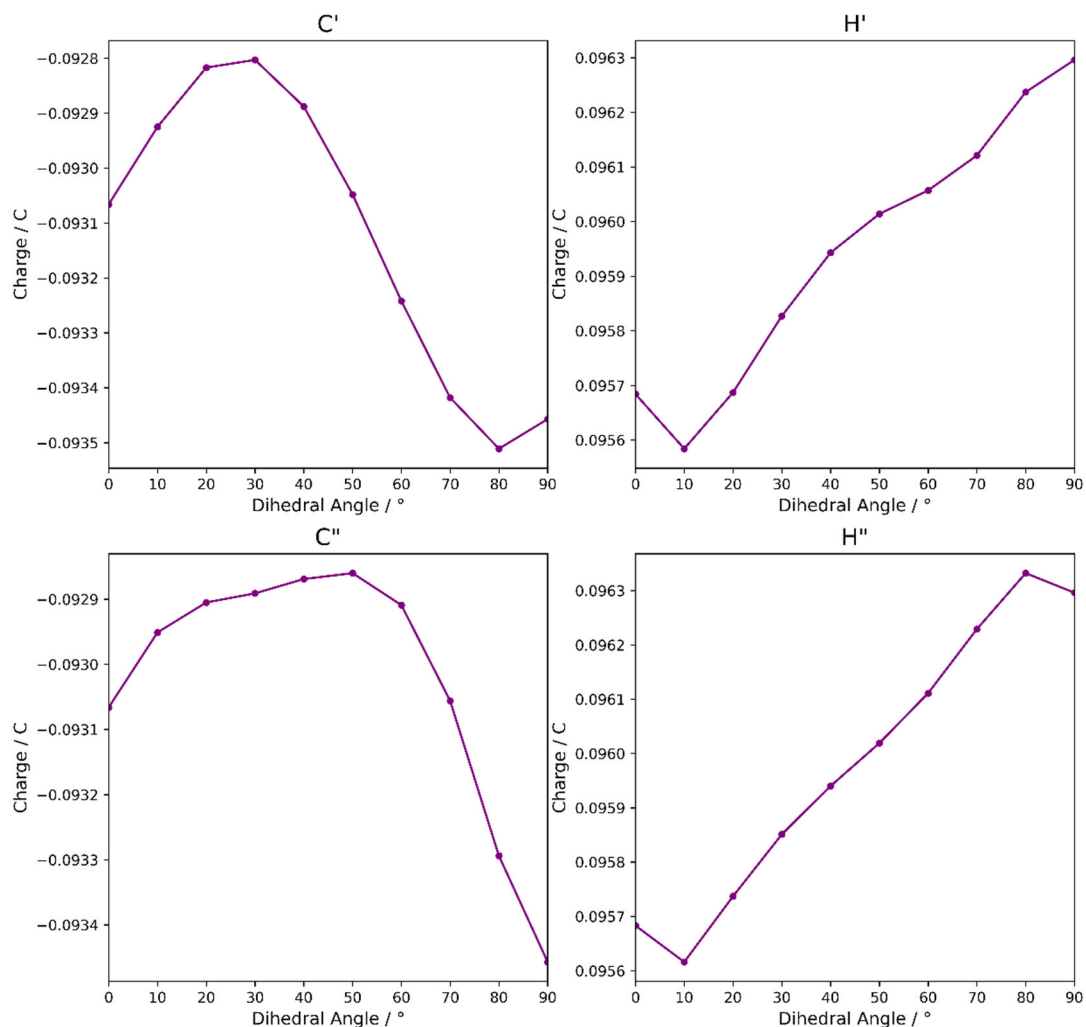

**Figure S15.** Charge Model 5 (CM5) charges for atoms involved in the H-H interaction for biphenyl. The H'-H'' charge separation was calculated by subtracting the H'' charge from the H' charge.

**Table S30.** Net CM5 charge change from 90° to 0° for five atom types. Positive charge difference indicates electron density decreases as the dihedral angle approaches zero. Negative charge difference indicates electron density increases as the dihedral angle approaches zero.

|                                | C'       | O'       | H'        | H''       | C''       |
|--------------------------------|----------|----------|-----------|-----------|-----------|
| <b><i>trans</i>-1-naphthol</b> | 0.006276 | 0.020825 | 0.000103  | -0.006450 | -0.018738 |
| <b><i>cis</i>-1-naphthol</b>   | 0.005287 | 0.016097 | -0.012526 | -0.000930 | -0.004424 |
| <b><i>trans</i>-2-naphthol</b> | 0.004300 | 0.021359 | -0.001350 | -0.004230 | -0.010043 |
| <b><i>cis</i>-2-naphthol</b>   | 0.005819 | 0.022029 | -0.000165 | -0.006150 | -0.018889 |
| <b>Biphenyl</b>                | 0.000391 | -        | -0.000610 | -0.000613 | -0.093294 |

## NBO Analysis

**Table S31.** Occupancy for each bonding<sup>b</sup> and anti-bonding<sup>c</sup> orbital for all four isomers of naphthol. <sup>a</sup>Average occupancy for *trans* 1-naphthol, *cis* 2-naphthol, and *trans* 2-naphthol.

|                        | <i>trans</i> -1-naphthol | <i>Cis</i> -2-naphthol | <i>trans</i> -2-naphthol | Average <sup>a</sup> | <i>cis</i> -1-naphthol |
|------------------------|--------------------------|------------------------|--------------------------|----------------------|------------------------|
| O'-H' BD <sup>b</sup>  | 1.98737                  | 1.98764                | 1.98781                  | 1.98761              | 1.98690                |
| O'-H' BD* <sup>c</sup> | 0.00690                  | 0.00681                | 0.00648                  | 0.00673              | 0.00911                |
| C''-H'' BD             | 1.97857                  | 1.97741                | 1.97873                  | 1.97824              | 1.97677                |
| C''-H'' BD*            | 0.01287                  | 0.01422                | 0.01334                  | 0.01348              | 0.01561                |

**Table S32.** Interaction energies between bonding and antibonding orbitals obtained from second order perturbative treatment of the Fock matrix for *trans*-1-naphthol

| <i>trans</i> -1-naphthol | C-H BD --- O-H BD*<br>/ kJ mol <sup>-1</sup> | O-H BD --- C-H BD*<br>/ kJ mol <sup>-1</sup> | Sum of Interactions<br>/ kJ mol <sup>-1</sup> |
|--------------------------|----------------------------------------------|----------------------------------------------|-----------------------------------------------|
| 0                        | 0.46                                         | 0.21                                         | 0.67                                          |
| 10                       | 0.42                                         | 0.21                                         | 0.63                                          |
| 20                       | 0.29                                         | 0.21                                         | 0.50                                          |
| 30                       | 0.17                                         | 0.21                                         | 0.38                                          |
| 40                       | 0.00                                         | 0.21                                         | 0.21                                          |
| 50                       | 0.00                                         | 0.17                                         | 0.17                                          |
| 60                       | 0.00                                         | 0.17                                         | 0.17                                          |
| 70                       | 0.00                                         | 0.17                                         | 0.17                                          |
| 80                       | 0.00                                         | 0.21                                         | 0.21                                          |
| 90                       | 0.00                                         | 0.00                                         | 0.00                                          |

**Table S33.** Interaction energies between bonding and antibonding orbitals obtained from second order perturbative treatment of the Fock matrix for *cis*-1-naphthol

| <i>cis</i> -1-naphthol | C-H BD --- O-H BD*<br>/ kJ mol <sup>-1</sup> | O-H BD --- C-H BD*<br>/ kJ mol <sup>-1</sup> | Sum of Interactions<br>/ kJ mol <sup>-1</sup> |
|------------------------|----------------------------------------------|----------------------------------------------|-----------------------------------------------|
| 0                      | 3.85                                         | 0.38                                         | 4.23                                          |
| 10                     | 3.35                                         | 0.38                                         | 3.72                                          |
| 20                     | 2.26                                         | 0.29                                         | 2.55                                          |
| 30                     | 1.13                                         | 0.21                                         | 1.34                                          |
| 40                     | 0.42                                         | 0.17                                         | 0.59                                          |
| 50                     | 0.13                                         | 0.08                                         | 0.21                                          |
| 60                     | 0.08                                         | 0.00                                         | 0.08                                          |
| 70                     | 0.00                                         | 0.00                                         | 0.00                                          |
| 80                     | 0.00                                         | 0.00                                         | 0.00                                          |

|    |      |      |      |
|----|------|------|------|
| 90 | 0.00 | 0.00 | 0.00 |
|----|------|------|------|

**Table S34.** Interaction energies between bonding and antibonding orbitals obtained from second order perturbative treatment of the Fock matrix for *trans*-2-naphthol

| <i>trans</i> -2-naphthol | C-H BD --- O-H BD*<br>/ kJ mol <sup>-1</sup> | O-H BD --- C-H BD*<br>/ kJ mol <sup>-1</sup> | Sum of Interactions<br>/ kJ mol <sup>-1</sup> |
|--------------------------|----------------------------------------------|----------------------------------------------|-----------------------------------------------|
| 0                        | 0.42                                         | 0.17                                         | 0.59                                          |
| 10                       | 0.38                                         | 0.17                                         | 0.54                                          |
| 20                       | 0.25                                         | 0.17                                         | 0.42                                          |
| 30                       | 0.13                                         | 0.13                                         | 0.25                                          |
| 40                       | 0.00                                         | 0.13                                         | 0.13                                          |
| 50                       | 0.00                                         | 0.13                                         | 0.13                                          |
| 60                       | 0.00                                         | 0.13                                         | 0.13                                          |
| 70                       | 0.00                                         | 0.13                                         | 0.13                                          |
| 80                       | 0.00                                         | 0.13                                         | 0.13                                          |
| 90                       | 0.00                                         | 0.13                                         | 0.13                                          |

**Table S35.** Interaction energies between bonding and antibonding orbitals obtained from second order perturbative treatment of the Fock matrix for *cis*-2-naphthol

| <i>cis</i> -2-naphthol | C-H BD --- O-H BD*<br>/ kJ mol <sup>-1</sup> | O-H BD --- C-H BD*<br>/ kJ mol <sup>-1</sup> | Sum of Interactions<br>/ kJ mol <sup>-1</sup> |
|------------------------|----------------------------------------------|----------------------------------------------|-----------------------------------------------|
| 0                      | 0.42                                         | 0.25                                         | 0.67                                          |
| 10                     | 0.38                                         | 0.25                                         | 0.63                                          |
| 20                     | 0.25                                         | 0.21                                         | 0.46                                          |
| 30                     | 0.13                                         | 0.21                                         | 0.33                                          |
| 40                     | 0.04                                         | 0.21                                         | 0.25                                          |
| 50                     | 0.00                                         | 0.21                                         | 0.21                                          |
| 60                     | 0.00                                         | 0.21                                         | 0.21                                          |
| 70                     | 0.00                                         | 0.21                                         | 0.21                                          |
| 80                     | 0.00                                         | 0.21                                         | 0.21                                          |
| 90                     | 0.00                                         | 0.21                                         | 0.21                                          |

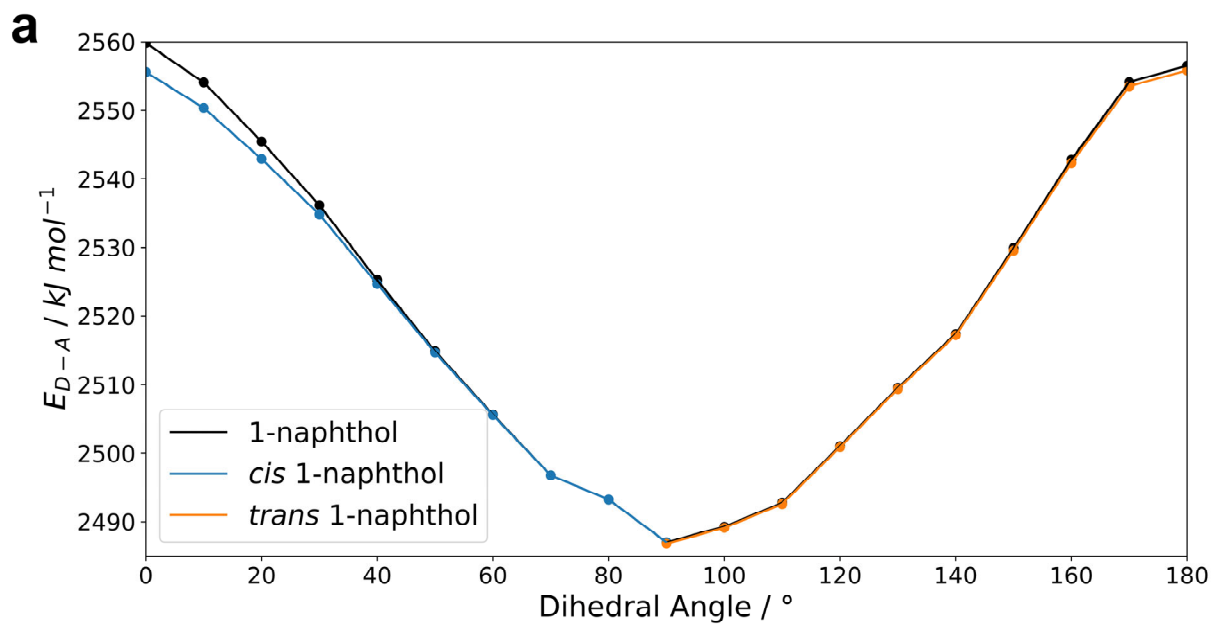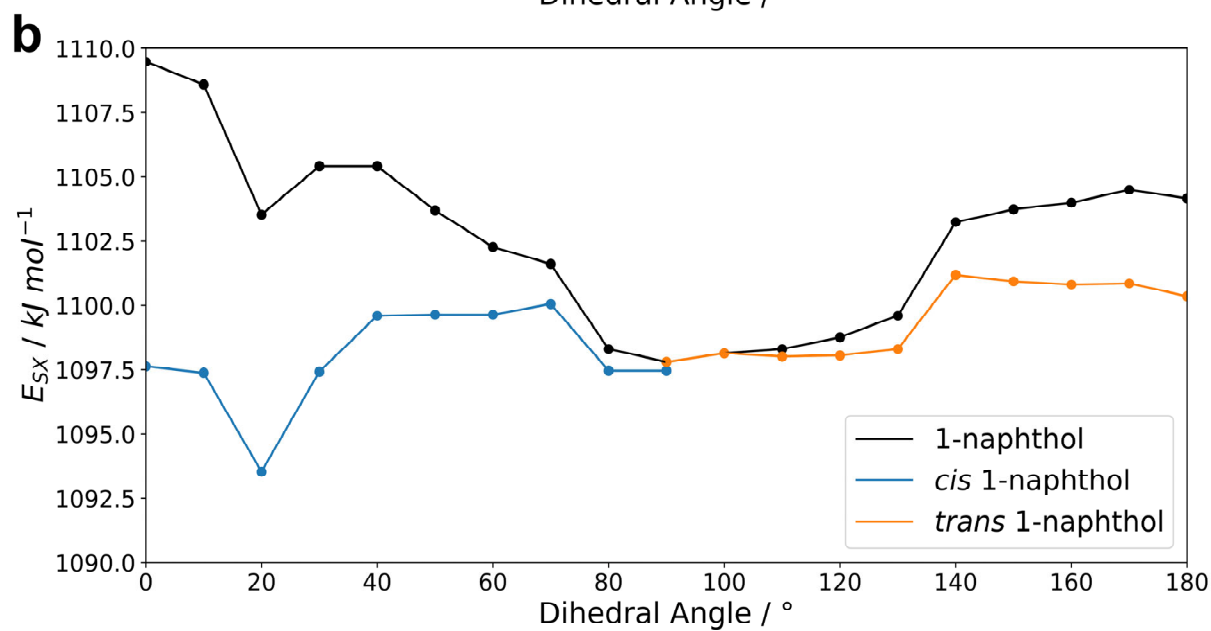

**Figure S16.** <sup>a</sup>Summed donor-acceptor (attraction) energies for 1-naphthol with the close contact H-H interactions subtracted. <sup>b</sup>Pairwise steric exchange (repulsion) energies for 1-naphthol with close contact H-H interactions subtracted.

**Table 36.** Attraction and repulsion energy comparison for *cis*-1-naphthol at the B3LYP-D3(BJ)/def-TZVP and  $\omega$ B97XD/Jun-cc-pVTZ level of theory

| Dihedral Angle | Attraction /kJ mol <sup>-1</sup> |                | Repulsion /kJ mol <sup>-1</sup> |                |
|----------------|----------------------------------|----------------|---------------------------------|----------------|
|                | B3LYP-D3(BJ)                     | $\omega$ B97XD | B3LYP-D3(BJ)                    | $\omega$ B97XD |
| <b>0</b>       | 4.2                              | 4.8            | 11.8                            | 13.5           |
| <b>30</b>      | 1.3                              | 1.7            | 8.0                             | 8.7            |
| <b>60</b>      | 0.1                              | 0.1            | 2.6                             | 2.7            |
| <b>90</b>      | 0.0                              | 0.0            | 0.3                             | 0.3            |
